1 ***Rab11* is essential for *lgl* mediated JNK–Dpp signaling in dorsal closure and epithelial**  
2 **morphogenesis in *Drosophila***

3 **Nabarun Nandy and Jagat Kumar Roy\***

4 **Cytogenetics Laboratory, Department of Zoology, Banaras Hindu University, Varanasi-**  
5 **221005**

6 **\* E-mail: [jkroy@bhu.ac.in](mailto:jkroy@bhu.ac.in)**

7 **Abstract:**

8 Dorsal closure in *Drosophila* provides a robust genetic platform providing deep insights into the  
9 basic cellular mechanisms that govern epithelial wound healing and morphogenesis. As dorsal  
10 closure proceeds, the adjacent epithelia advance contra-laterally involving coordinated cell shape  
11 changes in order to successfully accomplish the process. The JNK-Dpp signaling in these cells  
12 plays an instrumental role in guiding their fate as gastrulation completes. A huge number of genes  
13 have been reported to be involved in the regulation of this core signaling pathway, yet the  
14 mechanisms by which they do so is hitherto unclear, which forms the objective of our present  
15 study. Here we show that *lgl*, which is a potent tumour suppressor gene, conserved across the phyla  
16 till humans, regulates the JNK–Dpp pathway in the dorsal closure and epithelial morphogenesis  
17 process where in ectopic knockdown of this gene results in the failure of dorsal closure.  
18 Interestingly, we also find *Rab11* to be interacting with *lgl* as they together regulate the core JNK-  
19 Dpp signaling pathway during dorsal closure and also during pupal thorax closure process. Using  
20 the robust *Gal4-UAS* system of targeted gene expression, we show here that *Rab11* and *lgl*  
21 synergize to successfully execute the dorsal closure and the similar thorax closure process,  
22 ensuring proper spatio-temporal JNK-Dpp signaling.

23 **Key words:** LE, DLE, JNK-Dpp, *Rab11*, *lgl*, *Gal4-UAS*, Dorsal closure

24 **Introduction:**

25 The spectrum of cellular mechanisms employed by tumour suppressor mutations in order to help  
26 tumours grow and disseminate is diverse and enigmatic. A vast proportion of these tumour  
27 suppressor genes comprise of the ones coding for cell polarity (Bilder et al, 2000; Humbert et  
28 al,2003; Royer and Lu, 2011), which also happen to be developmentally active genes (Klezovitch  
29 et al, 2004) as they determine cellular differentiation at the time of tissue remodeling and  
30 morphogenesis (Tanentzapf and Tepass, 2003). Cell polarity determining genes, like other tumour  
31 suppressor genes, are developmentally active and exert their phenotype in the homozygous  
32 recessive state. Cellular polarity represents its differentiated state, especially in an epithelial tissue  
33 where the constituent cells show a robust apico-basal polarity and planar polarity. These polarities  
34 are determined by proteins or protein complexes which occupy distinct domains, either on the cell  
35 membrane or in the cytoplasm and their dynamics and cross talk with intracellular signaling bring  
36 about different cellular changes necessary for shaping tissues at the time of development. One such  
37 polarity determining gene is *lgl* which not only is a developmentally active gene but is also a potent  
38 tumour suppressor, capable of organizing intracellular cyto-architecture on one hand and on the  
39 other hand is responsible for regulating critically important cell signaling pathways like JNK (Zhu  
40 et al, 2010), Hippo (Sun and Irvine, 2011; Enomoto and Igaki, 2011) and Notch (Parsons et al,  
41 2014, Langevin et al, 2005; Portela et al, 2015). These signaling pathways have been studied in  
42 the context of the classically acclaimed function of *lgl* which is tumorigenesis (Humbert et al,  
43 2008, Hariharan and Bilder, 2006). Other than this function *lgl* has also been reported to be an  
44 essential regulator of neurogenesis (Peng et al, 2000) which if perturbed, can give rise to Brain  
45 tumours.

46 The early reports of *lgl*'s involvement in the process of embryonic epithelial morphogenesis arrives  
47 from the reports of Manfrulli et al, 1996, where temperature sensitive hypomorph alleles of *lgl*  
48 mutants show dorsal closure and head involution defects when reared at elevated temperatures.  
49 Similar observations were made by Tanentzapf and Tepass, 2002; Hutterer et al, 2004, where the  
50 latter group has revealed the interactions between the CDC-42, PAR6, APKC and *lgl* in the  
51 establishment of epithelial polarity in the developing embryos. Here it has been proven that PAR-  
52 6 protein's apical localization is CDC-42 dependent whereas on the other hand its expulsion from  
53 the baso-lateral cell cortex is *lgl* dependent. *lgl* activity is further facilitated by the activity of  
54 APKC which phosphorylates *lgl* in the apical cytoplasm and restricts its activity in the basal  
55 domain of the differentiated epithelial cells. Bilder et al, 2000, have shown the interaction of *lgl*  
56 with the junctional proteins, Scrib and Dlg, which form a strongly interacting Trio, indispensable  
57 for the establishment of epithelial cell polarity. Scrib and Dlg molecules remain physically  
58 associated with each other and they ascertain Lgl's presence and activity in the baso-lateral  
59 domain. The mutants of all three genes thus have similar consequences as all three of them behave  
60 as potentially strong tumour suppressors.

61 The activity of *lgl* has been shown to be intimately associated with the proper execution of the  
62 JNK pathway as has been reported by Zhu et al, 2010. The JNK signaling pathway is a core  
63 signaling pathway in the process of dorsal closure at the time of gastrulation in *Drosophila*  
64 embryos (Noselli, 1998; Noselli and Agnes, 1999; Ramet et al 2002; Stronach and Perimon, 2002).  
65 According to the reports of Noselli and Agnes, 1999, a strong JNK expression in the dorsal most  
66 lateral epithelial cells of the dorso-lateral epidermis (DLE) leads to the downstream expression  
67 and secretion of the Dpp morphogens under whose influence the dorsolateral epithelial cells  
68 undergo coordinated elongations in order to bring about the contralateral movement of the lateral

69 epithelia (LE) which ultimately zippers the dorsal opening. It has been observed by Arquier et al,  
70 2001 that *lgl* plays an instrumental role in the process of release of Dpp morphogen via exocytosis  
71 and acts upstream of its receptor *Thickveins*. This observation finds support from the studies of  
72 Zhang et al, 2005 where they have reported in a Yeast model that Lgl mediates polarized  
73 exocytosis by exerting its influence on the exocyst complex which tethers intracellular vesicles as  
74 they subsequently get docked to their cognate SNAREs on the target membranes. In this light, *lgl*  
75 also seems to be regulating intracellular vesicle transport which forms an essential mode of  
76 directed trafficking amidst the vast network of endomembrane systems present inside eukaryotic  
77 cells. An essential component of this endomembrane system is the recycling endosomes which  
78 participate in membrane recycling and exocytosis and is essentially marked with Rab11, a small  
79 conserved Ras like GTPase, which remains associated with vesicles emanating and fusing between  
80 recycling endosomes, trans Golgi apparatus and plasma membrane.

81 The present study focuses on the interaction of the tumour suppressor *lgl* with *Rab11* owing to its  
82 property to promote polarized trafficking inside differentiated cells. Rab11 has been proven  
83 beyond doubt to be interacting with essential components of the exocyst complex like Sec15 (Wu  
84 et al, 2005; Langevin et al, 2005; Guichard et al, 2015; Bhui and Roy, 2019) and Nuf (Cao et al,  
85 2008). Here we find that a targeted and conditional down-regulation of *lgl* using the robust *Gal4-*  
86 *UAS* (Brand and Perrimon,1993) system of targeted gene expression in *Drosophila*, in the  
87 dorsolateral epithelium of the gastrulating fly embryos, result in an up-regulation Rab11  
88 expression, which affects normal JNK-Dpp signaling in the DLE of the embryos. A down-  
89 regulation of Rab11 in the *lgl* down-regulated genetic background results in a significant rescue of  
90 the *lgl* down-regulated phenotype and a consequent restoration of the regular JNK and Dpp  
91 signaling pattern, which suggests a strong genetic interaction between the two.

92 **Materials and Methods:**

93 **Fly stocks and rearing conditions:**

94 All fly stocks have been reared on standard food preparation containing maize powder, agar, yeast  
95 and sugar with methyl-p-hydroxy benzoate as anti-fungal and also propionic acid as anti-bacterial  
96 agents at a temperature of  $23 \pm 1^\circ\text{C}$ . The stock *pnr<sup>MD237</sup>/TM3,Ser* was obtained from Bloomington  
97 *Drosophila* Stock Center (BDSC 3039, Thomas et al, 2009) and expresses Gal4 as reported by  
98 Calleja et al, 1996, which was further introgressed with *TM3, ActGFP, Ser<sup>l</sup>/TM6B* in order to  
99 generate *pnr<sup>MD237</sup>/TM3, ActGFP, Ser<sup>l</sup>* stock. *TRE-JNK* (Chatterjee and Bohmann, 2012) was  
100 introgressed with *Sp/CyO; pnr<sup>MD237</sup>/ TM3, ActGFP, Ser<sup>l</sup>* and *Sp/CyO; pnr<sup>MD237</sup>/TM6B* to obtain  
101 *TRE-JNK/CyO; pnr<sup>MD237</sup>/TM3, ActGFP, Ser<sup>l</sup>* and *TRE-JNK/CyO; pnr<sup>MD237</sup>/TM6B* stocks,  
102 respectively. *UAS-Rab11<sup>RNAi</sup>; +* (Sato et al, 2005), was introgressed with *+; UAS-lgl<sup>RNAi</sup>* (BDSC  
103 35773, Perkins et al 2015) to obtain *UAS-Rab11<sup>RNAi</sup>; UAS-lgl<sup>RNAi</sup>* stocks. *UAS-YFP-Rab11<sup>Q70L</sup>*  
104 stock (Zhang et al, 2007) was similarly introgressed with *UAS-lgl<sup>RNAi</sup>* in order to obtain *UAS-YFP-*  
105 *Rab11<sup>Q70L</sup>/CyO, ActGFP;UAS-lgl<sup>RNAi</sup>* stock. *Dpp-lacZ/CyO* (BDSC 68153) flies were double  
106 balanced to obtain *Dpp-LacZ/CyO-Act-GFP; dco2/ TM3, ActGFP, Ser<sup>l</sup>* stock which was further  
107 introgressed with *Sp/CyO-Act-GFP; pnr<sup>MD237</sup>/ TM3, ActGFP, Ser<sup>l</sup>* to obtain *Dpp-LacZ/CyO,*  
108 *ActGFP; pnr<sup>MD237</sup>/TM3, ActGFP, Ser<sup>l</sup>* stock. This stock was used as a driver in our experiments  
109 where only non-GFP embryos obtained from the crosses set with the *UAS* alleles of *Rab11* and *lgl*  
110 were proceeded for  $\beta$ -galactosidase staining.

111

112

113 **Embryo Collection and Fixation:**

114 All flies were made to lay eggs on standard agar plates supplemented with sugar and propanoic  
115 acid and eggs were collected as per the protocol suggested by Narasimha and Brown, 2006, with  
116 slight modifications. For whole mount preparations and immunostaining of embryos, different  
117 alleles and transgenes were balanced with GFP tagged balancers and only non GFP or driven  
118 embryos were selected for experimental purpose. Eversed clypeolabrum was treated as a marker  
119 of stage 13 and retracted clypeolabrum was treated as marker of stage 14 (Sasikumar and Roy,  
120 2009). Embryo staging was done according to Hartenstein's Atlas of *Drosophila* Development,  
121 1993.

122 **Genetics:**

123 In order to observe the tissue specific effects of *Rab11*, the *Gal4-UAS* system as described by  
124 Brand and Perrimon, 1993, was used to drive its alleles in stage13 and 14 fly embryos. *pnr<sup>MD237</sup>/*  
125 *TM3, ActGFP, Ser* stock was used as the Gal4 driver and *UAS* constructs of different alleles of  
126 *Rab11* were used to observe tissue specific effects of these genes. Males of *Gal4* stock and Virgin  
127 Females of *UAS* constructs were used to set up crosses in order to obtain embryos of the desired  
128 genotype. The desired genotypes were screened on the basis of GFP expression of the balancer  
129 chromosomes (Supplementary figure S1). These embryos were further staged as suggested by  
130 Green et al, 1993. The embryos of identical stages were further used for analysis of cell-biological  
131 and molecular parameters.

132

133

## 134 **Embryonic cuticle preparations**

135 *Drosophila* embryonic cuticles were prepared as described by Anderson, 1985; Ostrowski, 2002  
136 with slight modifications. The cuticles were fixed in glycerol:acetic acid (1:4) solution for 60 min  
137 at 37°C, mounted in Hoyer's mounting medium and then baked overnight (~12-14h) at 65°C. These  
138 cuticles were subjected to dark field microscopy in Nikon eclipse E800 microscope, and the images  
139 obtained were further processed using the aid of the Adobe Photoshop CS6 software. The  
140 embryonic cuticle of *Drosophila* has been extensively used to study the morphogenesis of the  
141 underlying epidermis. Any defect of the underlying epidermis thus becomes fairly evident in the  
142 secreted cuticle which can be observed by the above mentioned technique.

## 143 **Immunostaining, imaging and confocal microscopy**

144 *Drosophila* embryos were fixed and imaged as described by Narasimha and Brown, 2006. The  
145 dechorionated and devitellized embryos were fixed in 4% para-formaldehyde solution and stored  
146 in absolute methanol. For immunostaining, these embryos were rehydrated using methanol  
147 gradients of 70%, 50%, 30% and 10% in 0.1% PBT solution. The embryos were blocked for 2h at  
148 RT in blocking solution as described by Banerjee and Roy, 2017. Rabbit anti-sera against  
149 *Drosophila* Rab11 (Alone et al, 2005) was used at a dilution of 1:100 for immunostaining and  
150 1:1000 for western, DSHB anti-FasIII (7G10) antibody was used and secondary antibodies were  
151 used as described by Sasikumar and Roy, 2009; Bhuiin and Roy 2012; Ray and Lakhota, 2017,  
152 and were imaged using single photon confocal microscope using Zen software, 2012. The images  
153 obtained were analyzed using Zeiss LSM 510 Meta-software.

154 Dark field, fluorescence and phase contrast images of the embryos were taken under the Nikon  
155 eclipse E800 microscope under the same gain and exposure values. 22-24h developed embryos

156 were dechorionated and mounted in halocarbon oil in order to image them live in phase contrast  
157 as well as fluorescence microscope.

158

159 **Embryonic, pupal and larval lethality assays were performed according to standard**  
160 **procedures.**

161 The *Gal4-UAS* system of targeted gene expression was used in order to see the effects of alleles  
162 of *Rab11* on the embryonic lethality, where in every experiment males of the *Gal4* and virgin  
163 females of the *UAS* constructs were introgressed and embryos were collected from the F1  
164 generation. These embryos were incubated for 24 to 48 h at 23°C on standard agar plates and the  
165 total number of dead embryos (detected by yellowing colour of the eggs) were counted against  
166 total number of fertilized eggs. These fertilized eggs include the dead as well as the hatched  
167 embryos, and percentage death was calculated as:

168 
$$\frac{\text{Total no. of dead embryos}}{\text{Total no. of fertilised eggs}} \times 100\%$$

169 The % lethality for each cross was calculated in triplicates and the mean lethality so obtained was  
170 tabulated and graphically represented using MS-Excel-2013 spreadsheet software. The lethality  
171 caused due to balancers has been subtracted from those introgressions which involve balancer  
172 chromosomes in the *Gal4* and the *UAS* stocks.

173 The final percentages have been calculated as explained in the following instances:

174 In a *pnr-Gal4/TM3, Ser* introgressed with *UAS-Rab11<sup>N124I</sup>/CyO* experiment, *pnr-Gal4/TM3, Ser*  
175 introgressed with *+CyO* has been taken as a control. The lethality observed in the latter case was



176 subtracted from the lethality observed in the experimental case. The final lethality % value was  
177 multiplied by 4 as only 1/4<sup>th</sup> of the F1 obtained from the experimental cross would have *UAS-*  
178 *Rab11<sup>NI24I</sup>* driven by *pnr-Gal4* according to Mendelian ratios. Similarly if *UAS-Rab11<sup>RNAi</sup>* were to  
179 be driven by the same *Gal4*, the control cross would be *pnr-Gal4* driven +/+. The lethality or  
180 eclosion percentage obtained in the latter would be subtracted from the experimental cross and the  
181 resulting value would be multiplied by 2 as only 50% of the progeny derived from the experimental  
182 cross would have *UAS-Rab11<sup>RNAi</sup>* driven by *pnr-Gal4*.

### 183 **β-galactosidase (LacZ) reporter assay:**

184 In order to observe the Dpp expression pattern in a mutation deficient background, *dpp-LacZ/CyO*  
185 (Bloomington stock: 68153) flies were brought in a wild type background by introgression with  
186 +/+ flies such that the F1 progeny had the *dpp-LacZ/+* genotype, which were then made to lay  
187 eggs on standard sugar-agar plates from which eggs were collected, dechorionated and devitellized  
188 according to standard protocol described by Sasikumar and Roy, 2009. These embryos were rinsed  
189 thoroughly in 1X PBS and fixed in 4% PFA for 10 min. After thorough rinsing with 1X PBS these  
190 were then suspended in LacZ staining solution with 8% X-Gal in DMSO pre-incubated at 37°C  
191 for 1h or till colour developed. As the embryos developed blue colour, they were washed in 1X  
192 PBS solution and mounted in 70% Glycerol in Bridge slides. The same protocol was followed in  
193 the experimental conditions also. The embryos were imaged under a Nikon Digital Sight DS-Fi2  
194 camera installed on a Nikon SMZ800N stereo-binocular microscope.

195

196

197

198 **Semi-Quantitative RT-PCR:**

199 12-13h synchronized, 200 embryos of stage 14-early stage 15 were collected, washed in DEPC  
200 treated 1X-PBS and then proceeded for total RNA isolation by the Trizol method as prescribed by  
201 the manufacturer' protocol (Sigma Aldrich, India). RNA pellets so obtained were dissolved in  
202 nuclease free MQ water and quantified spectrophotometrically. 1 µg of RNA from these samples  
203 were incubated with 2U of RNase free DNaseI (MBI, Fermentas, USA) for 30 min at 37°C for  
204 removal of any remaining DNA. First strand cDNA synthesis was carried out by 1 µg of total  
205 RNA as described by Ray et al, 2019. The prepared cDNA were subjected to PCR amplification  
206 for a 25µl of reaction mix containing 50 ng of cDNA, 25pM each of the forward and reverse  
207 primers, 200µM of each dNTP (Sigma Aldrich USA) and 1.5U of Taq DNA Polymerase (Geneaid,  
208 Bangalore), which were carried out under the following conditions: Denaturation for 3min at 94°C  
209 followed by annealing for 30 sec at 60°C with an extension for 30 sec at 72°C for 30 cycles and  
210 with a 7 min final extension at 72°C in the last cycle. The products were run on a 2% Agarose gel  
211 with a 50 bp ladder. The following were the primer sequences for *lgl* and *G3PDH*:

212 *lgl* (forward and reverse):

213 ATAGAGATGTCGCTGAAGTTCTTGT

214 GAGTGAAGATATGGCGCTTTGATAG

215 *G3PDH* (forward and reverse):

216 CCACTGCCGAGGAGGTCAACTA

217 GCTCAGGGTGATTGCGTATGCA

218 Gel images were analyzed in UV Transilluminator gel documentation and analysis system  
219 (Syngene). For all RT-PCR analysis, band intensities were measured by two methods: Alpha  
220 imager software and Histogram tool of Adobe photoshop CS6 software. Each experiment was  
221 carried out four times from which mean values were calculated taking into account the slightest  
222 variations.

### 223 **Results:**

#### 224 **A targeted down-regulation of *lgl* in the dorso-lateral epidermis resulted in the dorsal open** 225 **phenotype similar to JNK pathway mutants:**

226 The embryonic cuticle of *Drosophila* is an index of proper epithelial morphogenesis process  
227 involving a large amount of tissue level and cell biological changes which at the time of  
228 development is regulated by a large number of genetic and environmental factors. Any  
229 perturbation in these factors leads to an improper morphogenesis process which is detectable in  
230 the secreted cuticle, thereby making it an excellent indicator of the successful execution of  
231 morphogenesis process. Thus 22-24 h synchronized *pnr-Gal4* (*pnr<sup>MD237</sup>*) driven *UAS-lgl<sup>RNAi</sup>*  
232 embryos were proceeded for cuticle preparations according to standard protocols, using *pnr<sup>MD237/+</sup>*  
233 and *+/+* embryos as controls. The cuticles were imaged by Dark Field Microscopy at 20X  
234 magnification under Nikon Eclipse E800 microscope and the final images were processed using  
235 Adobe Photoshop CS6 software. It was observed that *pnr-Gal4* driven *UAS-lgl<sup>RNAi</sup>* embryos show  
236 a characteristic puckering of the cuticles along with a characteristic dorsal opening where 23 out  
237 of a total 66 cuticles observed, showed this phenotype when embryos were collected from the F1  
238 of a cross between *pnr<sup>MD237/TM3,Act-GFP</sup>* males and *UAS-lgl<sup>RNAi</sup>* females. These embryos also

239 reveal a characteristic dorsal opening, much like the puckered loss of function mutants as  
240 compared to the undriven embryos which show no such features.

241

242

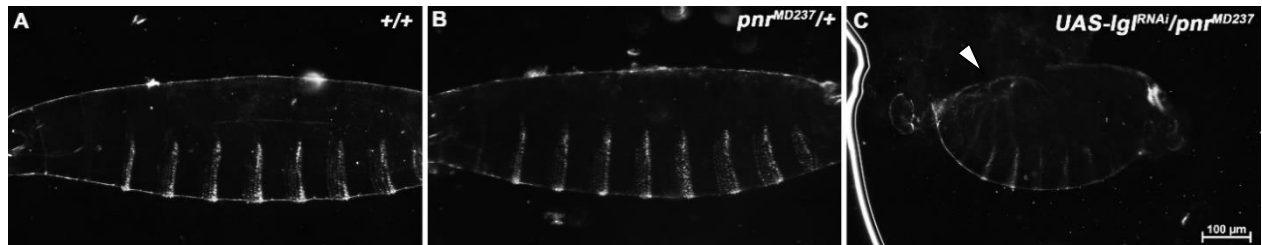

243 **Fig 1:** Dark field photomicrographs of embryonic cuticles under different genetic backgrounds,  
244 wild type (A),  $pnr^{MD237/+}$  heterozygous (B) and  $pnr^{MD237}$  driven  $UAS-lgl^{RNAi}$  (C). Note the  
245 shortening of the embryo, the puckering and the dorsal opening of the embryo (white arrow) of  
246 (C) as compared to (A) and (B).

247 **Leading edge cells and cells of the dorso-lateral epidermis show significant morphological**  
248 **defects in *Rab11*, *basket* and *lgl* conditional mutants**

249 Conditionally driven  $UAS-bsk^{DN}$  and  $UAS-lgl^{RNAi}$  mutants showed strong resemblances in their  
250 cuticular phenotypes which could arise due to similar cell morphological defects. Thus, in order  
251 to observe the cellular defects in all of the above genetic backgrounds, stage 14 (embryos with  
252 retracted Clypeolabrum) driven embryos were at first screened on the basis of GFP and non GFP  
253 (Note:  $pnr-Gal4$  is balanced with  $TM3$ ,  $Ser$ ,  $Act-GFP$ ) (Supplementary data S1) and the non-GFP  
254 embryos were proceeded for immune-staining with anti-FasIII antibody and were then  
255 counterstained with DAPI. FasIII was detected with anti-mouse AF-488 secondary and imaged  
256 under the confocal microscope. Corresponding projections and magnified sections have been  
257 shown in the alongside figure. The morphology and the shape of LE and DLE cells show a

258 patterned elongated structure in the wild type conditions. However, the mutants lack this  
259 characteristic feature, instead they assume a somewhat hexagonal structure which signifies that the  
260 elongated morphology of the DLE cells is under the strong influence of the region specific  
261 *bsk*/JNK signaling, which, if perturbed results in a failure of the necessary morphological changes.  
262 Here we also show that a targeted down-regulation of *lgl* by driving *UAS-lgl<sup>RNAi</sup>* by *pnr-Gal4*  
263 shows a similar phenotype which could be in a way regulating proper JNK-Dpp signaling in that  
264 region. The targeted down-regulation of *lgl* in *pnr-Gal4* driven *UAS-lgl<sup>RNAi</sup>* individuals thus show  
265 a characteristic dorsal closure defect as seen in JNK pathway mutants like *basket*, *hep*, *slpr* or *puc*.  
266

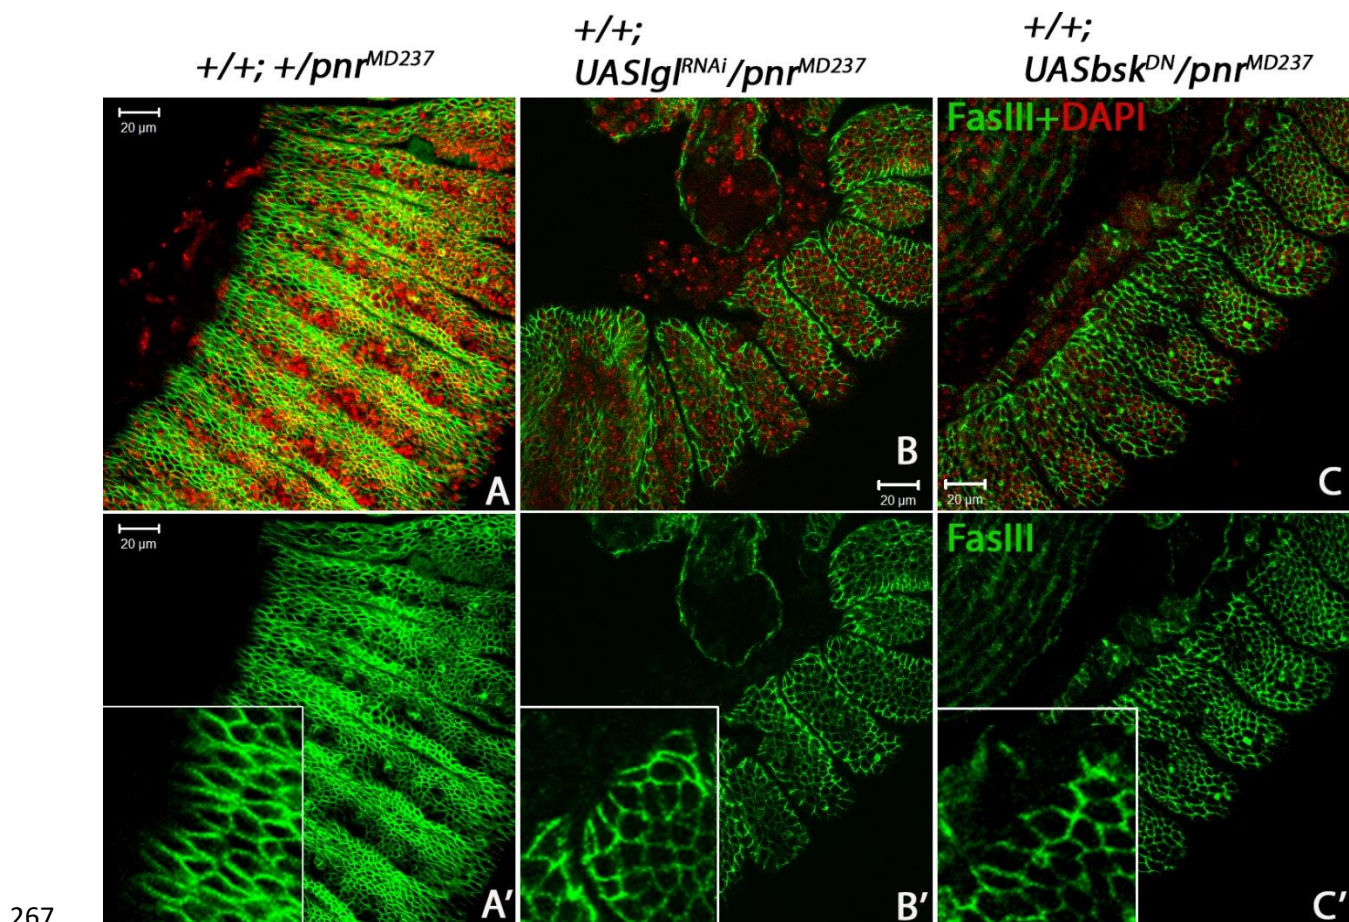



268 **Fig 2.** Confocal sections of late stage 13 embryos stained for FasIII (green) and DAPI (red) in  
269 different genetic backgrounds. Wild Type (A-A') embryos are showing elongated epithelial cells  
270 which is a necessary morphological modification required to bring about dorsal closure. (B-B' and  
271 C-C') shows *pnr<sup>MD237</sup>* driven *UAS-lgl<sup>RNAi</sup>* and *UAS-bsk<sup>DN</sup>* embryos, where cells of the dorso-lateral  
272 epithelium and the DLE cells do not show the regular dorso-ventrally elongated feature as shown  
273 by cells of the wild type embryos.

274 ***Rab11* interacts with *lgl* in the process of epithelial morphogenesis:**

275 The *lgl* gene in *Drosophila* codes for a PDZ domain containing cytoskeletal protein which is a  
276 major baso-lateral polarity determinant in differentiated epithelial cells. Apart from its strong roles  
277 in tumorigenesis, which seems to be conserved across the phyla, it is also a potentially strong  
278 developmentally active gene which has been studied and shown to regulate the process of epithelial  
279 morphogenesis (Manfrulli et al, 1996). In our experiments, we find that *lgl* shows a strong genetic  
280 interaction with Rab11. We observed this interaction as a rescue of the embryonic lethality  
281 observed in *pnr<sup>MD237</sup>* driven *UAS-lgl<sup>RNAi</sup>*; *UAS-Rab11<sup>RNAi</sup>* individuals as compared to the individual  
282 embryonic lethality values obtained from the F1 of *pnr-Gal4* driven *UAS-lgl<sup>RNAi</sup>* and *pnr-Gal4*  
283 driven *UAS-Rab11<sup>RNAi</sup>*. Similarly an upsurge of embryonic lethality was observed when *UAS-*  
284 *Rab11CA* (*UAS-YFP-Rab11<sup>Q70L</sup>*) introgressed with *UAS-lgl<sup>RNAi</sup>* was driven by *pnr-Gal4*  
285 suggesting that perturbation of *lgl* in the epithelial cells essentially affects Rab11 titers thereby  
286 suggesting its regulatory effect over intracellular Rab11 levels.

287 As we show in Fig 3, the dorso-ventral polarity of cells of the LE is evident from their regular  
288 rhomboid geometry, with the DLE cells showing a significant dorso-ventral elongation. This  
289 suggests their importance as they further induce cell shape changes in the dorsolateral epithelium

290 necessary for the successful execution of the dorsal closure process. Stage 14 embryos, were  
291 stained for Zona Occludens (septate junction) marker, FasIII (green), and counterstained with  
292 DAPI. It was observed that the cells of the LE in *pnr-Gal4* driven *UAS-lgl<sup>RNAi</sup>* individuals and *pnr-*  
293 *Gal4* driven *UAS-Rab11<sup>RNAi</sup>* individuals show a considerable loss of this geometry as well as  
294 polarity, where the cells show all sorts of shapes, like hexagon, pentagon or even circles. This is a  
295 clear indicative of the fact that these cells undergo a considerable degree of polarity loss when  
296 *Rab11* or *lgl* is individually knocked down, however in the latter case, the extent of this polarity  
297 loss is more pronounced as compared to the *Rab11* knockdown individual. However, when both  
298 the genes are knocked down simultaneously, a rescue was obtained where cells more or less  
299 resembled the wild type morphology.

300 It was also observed that from a total of 389 *pnr-Gal4* driven *UAS-lgl<sup>RNAi</sup>* individuals, 45  
301 individuals or 11.56% were found dead. After subtraction of a balancer lethality of 1.39% from  
302 this observed value, net lethality turned out to be 10.18%. As this result was obtained in 50% of  
303 driven progeny, therefore out of an expected 100% driven progeny, lethality value turns out to be  
304 20.36%. Similarly from a total of 402 *pnr-Gal4* driven *UAS-Rab11<sup>RNAi</sup>* individuals, 37 individuals  
305 or 9.2% were found dead. After subtraction of balancer lethality of 1.39%, net lethality turned out  
306 to be 7.81%. As this result was obtained in 50% of driven progeny therefore out of an expected  
307 100% driven progeny, lethality value was calculated as 15.62%. Again, from a total of 491 *pnr-*  
308 *Gal4* driven *UAS-Rab11<sup>RNAi</sup>; UAS-lgl<sup>RNAi</sup>* individuals, 11 individuals or 2.24% were found dead.  
309 After the subtraction of a balancer lethality of 1.39% net lethality turned out to be 0.85%. As this  
310 result was obtained in 50% of driven progeny therefore out of an expected 100% driven progeny,  
311 lethality value turns out to be 1.7%. This suggests a strong rescue of *lgl* knockdown phenotype by  
312 a simultaneous *Rab11* knockdown in the same tissue.

313 A complete reversal of the phenotype was seen when *UAS-Rab11<sup>CA</sup>* allele was simultaneously  
 314 driven in an *lgl<sup>RNAi</sup>* background by *pnr-Gal4*. It was observed that from a total of 218 *pnr-Gal4*  
 315 driven *UAS-Rab11<sup>CA</sup>* individuals, 6 individuals or 2.75% were found dead. After subtraction of  
 316 balancer lethality of 2.39%, net lethality turned out to be 0.36%. As this result was obtained in  
 317 25% of driven progeny therefore, out of an expected 100% driven progeny, lethality value turns  
 318 out to be 1.44%. On a similar note, it was observed that from a total of 418 *pnr-Gal4* driven *UAS-*  
 319 *Rab11<sup>CA</sup>; UAS-lgl<sup>RNAi</sup>* individuals, 293 individuals or 70.09% were found dead. After subtraction  
 320 of balancer lethality of 56.39%, net lethality turned out to be 13.70%. As this result was obtained  
 321 in 25% of driven progeny therefore out of an expected 100% driven progeny, lethality value turns  
 322 out to be 54.82%. This suggests a strong upsurge of the lethal phenotype when *Rab11* is over-  
 323 expressed in an *UAS-lgl<sup>RNAi</sup>* background. Supplementary Table 1 further elaborates our  
 324 observations as it provides greater details of the cross schemes set up to study the consequence of  
 325 *Rab11* and *lgl* perturbation in embryonic survivability.

326

327

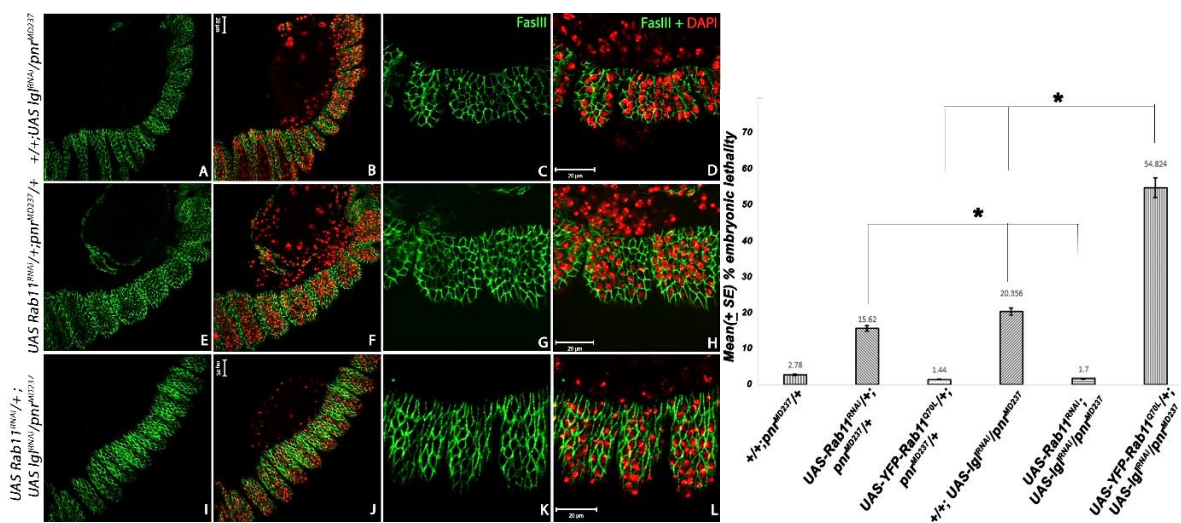

328

(a)

(b)



329 **Fig 3: (a)** Confocal sections showing lateral epithelial cells of stage 14 embryos immunostained  
330 for FasIII (green) and counterstained with DAPI (red pseudo-colour provided here). (A-D)  
331 represents *pnr-Gal4* driven *UAS-Igl<sup>RNAi</sup>* individuals, where C-D are 2.5 times magnified sections  
332 of A and B, respectively. E-H represents *pnr-Gal4* driven *UAS-Rab11<sup>RNAi</sup>* individuals where G and  
333 H are the 2.5 times magnified image of E and F, respectively. (I-L) represents *pnr-Gal4* driven  
334 *UAS-Rab11<sup>RNAi</sup>; UAS-Igl<sup>RNAi</sup>* individuals, where K-L are 2.5 times magnified sections of I and J,  
335 respectively. The cell morphologies are much rescued in the panels I-L as compared to A-D and  
336 E-H. **(b)** Graph showing lethality caused by different *UAS* constructs of *Rab11* and *Igl* when driven  
337 by *pnr-Gal4*. The lethality values have been calculated out of an expected 100 percentage of *pnr*  
338 driven *UAS-Rab11* and *UAS-Igl* constructs. P value at  $\leq 5\%$  error has been considered significant.

339 ***Igl* knockdown in the dorsolateral epidermis shows a significant upsurge of *Rab11* expression**  
340 **levels**

341 As shown in our previous experiments an *UAS-Igl<sup>RNAi</sup>* or a *UAS-Rab11<sup>RNAi</sup>* when driven by *pnr-*  
342 *Gal4*, results in dorsal closure defects much like JNK pathway mutants, provided these constructs  
343 are driven individually. However, a simultaneous down-regulation of both *UAS-Igl<sup>RNAi</sup>* as well as  
344 *Rab11<sup>RNAi</sup>* in the same embryos results in the rescue of the dorsal open condition which  
345 consequently manifests in the form of embryonic survivability. In order to observe the expression  
346 of *Rab11* in a *pnr-Gal4* driven *UAS-Igl<sup>RNAi</sup>* background, stage 13-14 embryos (detected by their  
347 everted clypeolabrum) were immunostained for *Rab11* and *FasIII* antigens and detected with anti-  
348 Rabbit AF-488 and anti-mouse AF-546 secondary antibodies. It was observed that a strong up-  
349 regulation of *Rab11* follows the knockdown of *Igl* by *pnr-Gal4* driven *UAS-Igl<sup>RNAi</sup>* in the DLE. On  
350 driving *UAS-Rab11<sup>RNAi</sup>; UAS-Igl<sup>RNAi</sup>* by *pnr-Gal4*, results in a rescue. This suggests that a *Rab11*

351 over-expression in an *lgl* knockdown background could be responsible for the *lgl* mediated  
352 phenotypes, at least as seen in the case of embryonic dorsal closure process (Fig. 4).

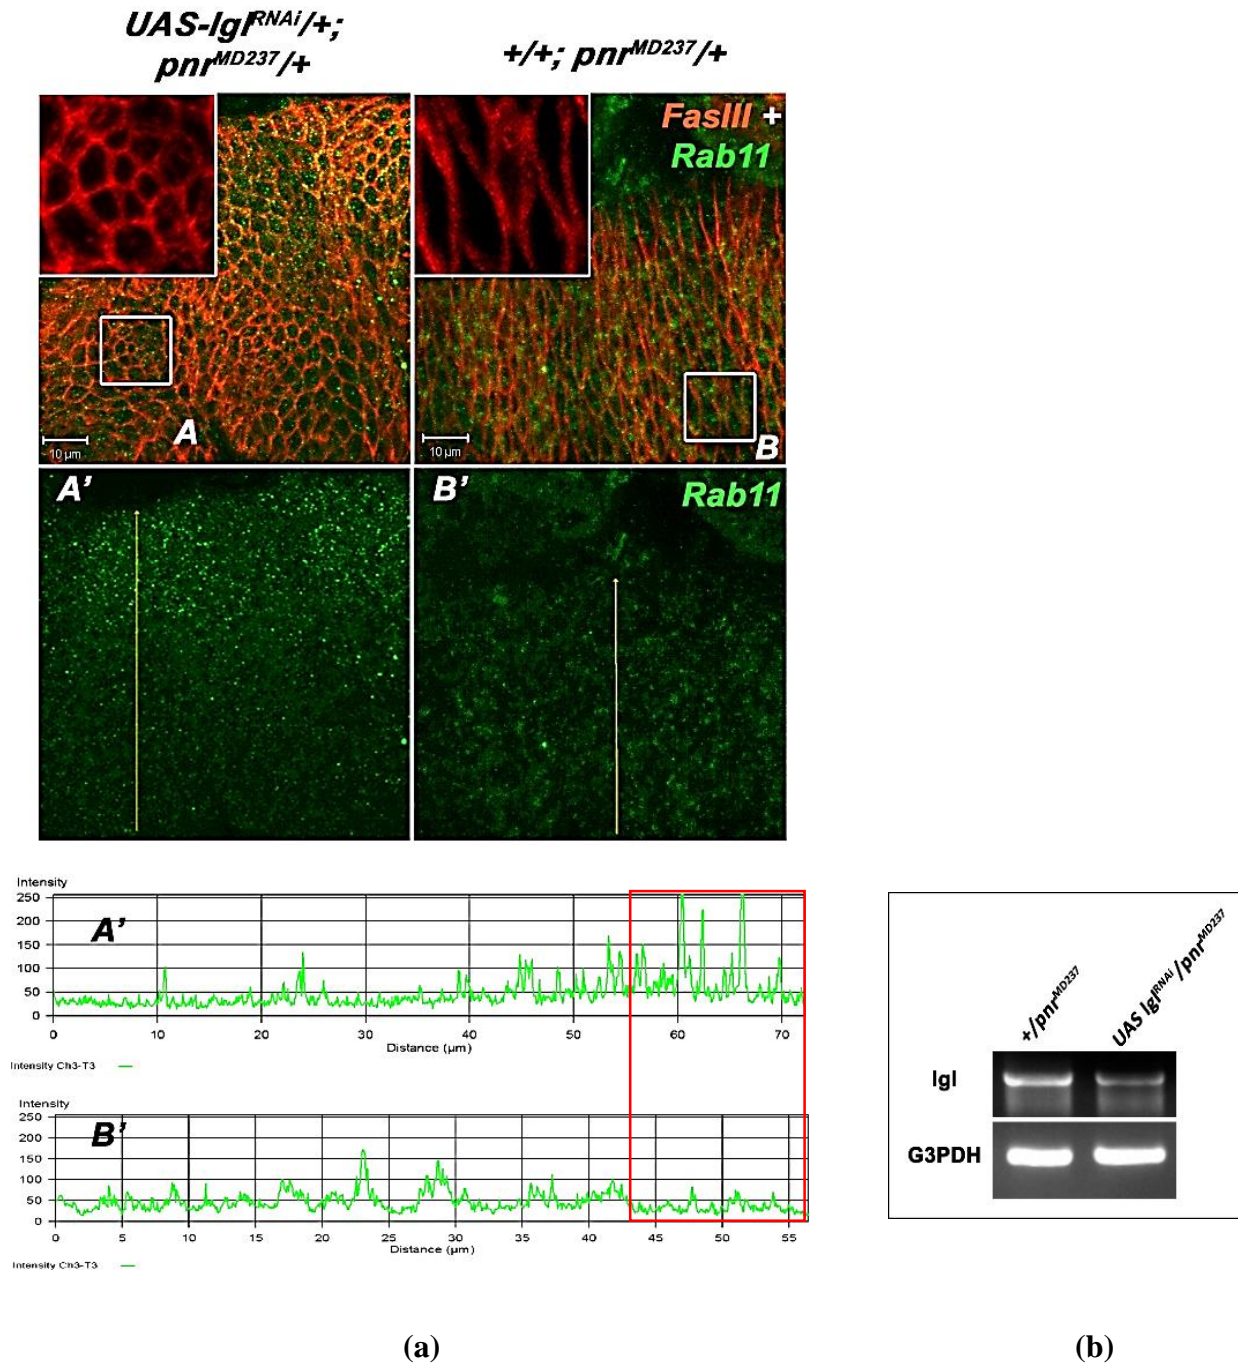

**Fig 4. (a)** Confocal projection images of late stage 13 *Drosophila* embryos immunostained for FasIII (red) and Rab11 (green). Insets in A and B represent the morphology of the lateral epithelial

357 cells which undergo a strong loss of polarity as compared to the undriven control. Note the upsurge  
358 of Rab11 in the dorsolateral edge of the lateral epidermis which is consistent for all *pnr-Gal4*  
359 driven *UAS-lgl<sup>RNAi</sup>* embryos. Quantitative graphical analysis of the mean intensities of Rab11  
360 (green) through the regions of the yellow arrow reaching up to the dorsal end of the LE (A'  
361 showing Rab11 expression levels in *pnr-Gal4* driven *UAS-lgl<sup>RNAi</sup>* individuals and B' showing  
362 Rab11 expression levels in an undriven condition). Note the upsurge of *Rab11* in A' as compared  
363 to B'. (b) Semi-Quantitative RT –PCR results depicting the effect of *UAS-lgl<sup>RNAi</sup>* driven by *pnr-*  
364 *Gal4* on *lgl* transcripts in stage 13 embryos where there is significant decline in *lgl* transcript levels.

365 ***Rab11* and *lgl* show a genetic interaction in the process of thorax closure during pupal**  
366 **development and adult thorax formation:**

367 The events of dorsal closure and thorax closure employ overlapping cellular mechanisms such as  
368 coordinated cell shape changes in order to bring about their successful execution. These processes  
369 trigger some core signaling cascades like the JNK- Dpp pathway, whose upstream regulation is  
370 again governed by the proper expression pattern of several genes regulating different aspects of  
371 cell biology. To confirm, whether the two genes i.e., *lgl* and *Rab11* interact in a similar manner at  
372 the time of thorax closure process also, which involves the contralateral elongation and fusion of  
373 wing imaginal disc nota again under the influence of JNK-Dpp signaling.

374 Observation of dorsal epithelial morphologies of larva, pupa, and adult *Drosophila* were observed  
375 which suggested that the interaction of *Rab11* and *lgl* is essential for the morphogenesis of the  
376 dorsal epithelium wherein embryos which are rescued in a simultaneous *lgl* and *Rab11* knockdown  
377 condition as shown in the previous experiments, emerge as larvae with and without dorsal  
378 epithelial lesions (Fig. 5a). Out of a total of 650 non-tubby third instar larvae obtained from the  
379 cross *pnr-Gal4/TM6B* X *UAS-Rab11<sup>RNAi</sup>; UAS-lgl<sup>RNAi</sup>*, 566 larvae or a mean of 87.76% of the

380 rescued third instar larvae show dorsal lesions or a partial rescue and they do not emerge as flies  
381 exhibiting drastic thorax closure defects (Fig. 5b), whereas the ones with complete rescue ~12.23%  
382 do not show any dorsal closure defects and emerge as healthy flies (Fig. 5d).

383 Fly eclosion data was also calculated for *pnr-Gal4* driven *UAS-Igl<sup>RNAi</sup>* genotype where remarkable  
384 similarities with *pnr-Gal4* driven *UAS-Rab11<sup>RNAi</sup>* were observed. *UAS-Igl<sup>RNAi</sup>* alleles introgressed  
385 with *UAS-Rab11<sup>RNAi</sup>* or *UAS-YFP-Rab11<sup>Q70L</sup>* alleles were driven by *pnr-Gal4* and the number of  
386 flies which eclosed from the pupae were calculated for these introgressed alleles. The results were  
387 similar to the embryonic lethality experiments, where a rescue was observed in *pnr-Gal4* driven  
388 *UAS-Rab11<sup>RNAi</sup>;UAS-Igl<sup>RNAi</sup>* individuals where out of an expected 100% driven flies, 29.48%  
389 eclosed, as compared to the *pnr-Gal4* driven *UAS-Rab11<sup>RNAi</sup>* individuals where out of an expected  
390 100%, 10.38% eclosed or *pnr-Gal4* driven *UAS-Igl<sup>RNAi</sup>* individuals where out of an expected 100%,  
391 12.22% eclosed. However, when *UAS-Rab11<sup>Q70L</sup>; UAS-Igl<sup>RNAi</sup>* was driven with *pnr-Gal4*, the  
392 eclosion percentage of the driven individuals sharply fell to 4.54% out of an expected 100% driven  
393 progeny showing *Rab11* overexpression in an *UAS-Igl<sup>RNAi</sup>* background results into augmentation  
394 of the lethal phenotype as compared to *pnr-Gal4* driven *UAS-Igl<sup>RNAi</sup>* condition, corroborating our  
395 embryonic lethality assay results (Fig. 5c).

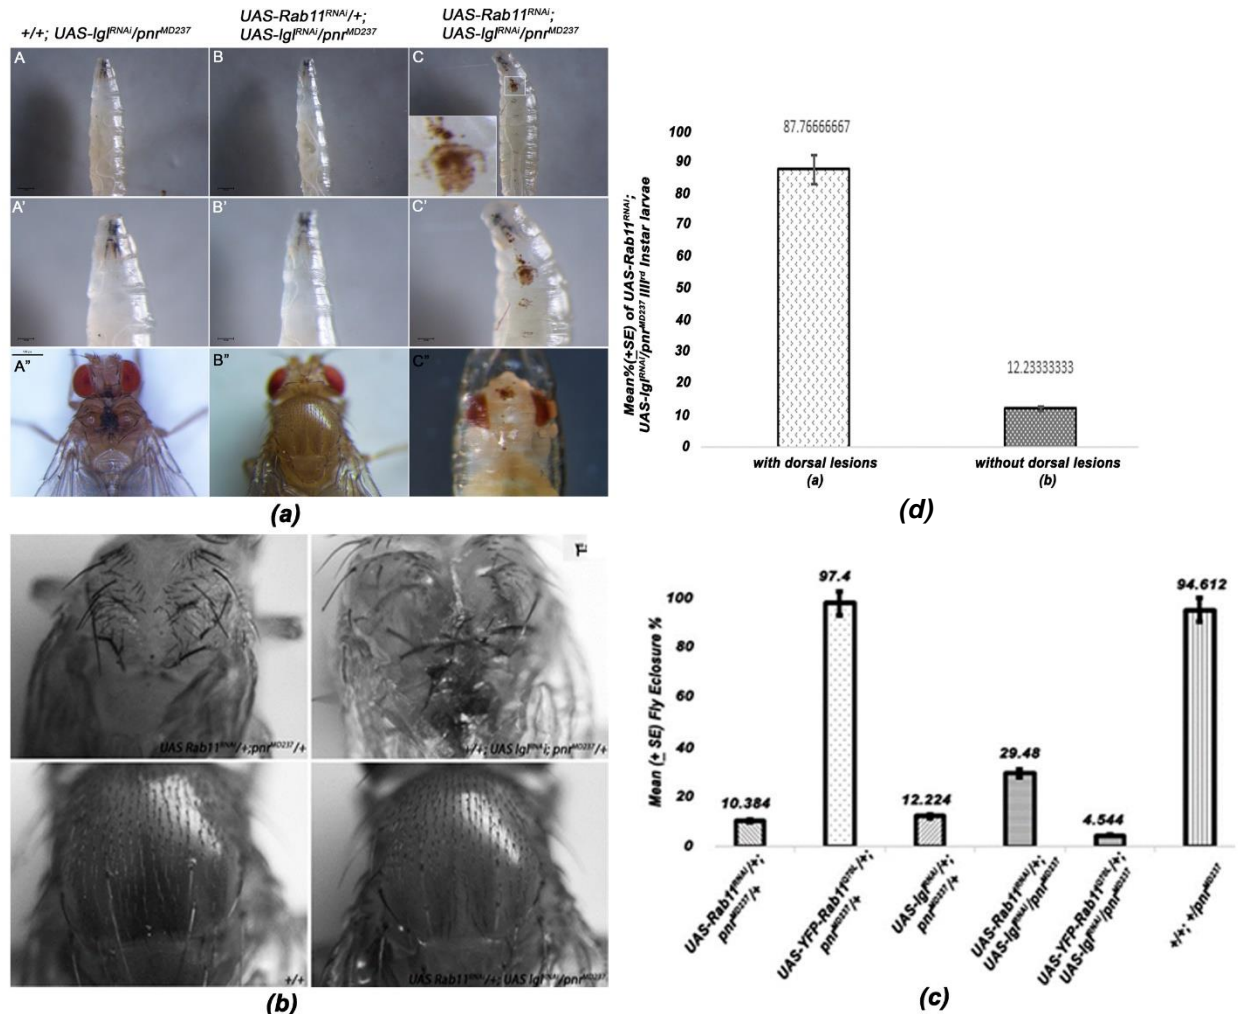

396

397

398 **Fig 5a.** Photomicrographs of late third instar larvae showing dorsal cuticles of *pnr-Gal4* driven  
 399 *UAS-IgIRNAi* : (A-A'') completely rescued, *pnr-Gal4* driven *UAS-Rab11<sup>RNAi</sup>;UAS-Ig<sup>RNAi</sup>* (B-B'')  
 400 and partially rescued *pnr-Gal4* driven *UAS-Rab11<sup>RNAi</sup>;UAS-Ig<sup>RNAi</sup>* individuals (C-C''). **b.**  
 401 Photomicrographs of adult thoraces in a *+/+* or wild type, *pnr-Gal4* driven *UAS-Rab11<sup>RNAi</sup>*, *pnr-*  
 402 *Gal4* driven *UAS-Ig<sup>RNAi</sup>* and *pnr-Gal4* driven *UAS-Rab11<sup>RNAi</sup>;UAS-Ig<sup>RNAi</sup>* genetic backgrounds. **c.**  
 403 Graphical representation of changes in mean percentage of fly eclosion as observed in *pnr-Gal4*  
 404 driven *UAS-Ig<sup>RNAi</sup>* background and *UAS-Ig<sup>RNAi</sup>* introgressed with different *UAS*-constructs of



405 *Rab11*. As observed earlier, *pnr-Gal4* driven *UAS-Rab11<sup>RNAi</sup>*, *UAS-Rab11CA* or *UAS-lgl<sup>RNAi</sup>* show  
406 individual eclosion percentages of 10.38%, 97.4% and 12.22%. However, a mean eclosion  
407 percentage of 29.48% was observed in *pnr-Gal4* driven *UAS-Rab11<sup>RNAi</sup>*; *UAS-lgl<sup>RNAi</sup>* progeny and  
408 on the contrary *pnr-Gal4* driven *UAS-YFP-Rab11<sup>Q70L</sup>*; *UAS-lgl<sup>RNAi</sup>* shows an eclosion percentage  
409 of 4.54%. These flies showed severe thorax closure defects which suggests that *Rab11*  
410 overexpression in an *lgl* down-regulated genetic background results in an aggravated lethality due  
411 to dorsal closure and thorax closure defects. **d.** Graph representing the ratios of *pnr-Gal4* driven  
412 *UAS-Rab11<sup>RNAi</sup>*; *UAS-lgl<sup>RNAi</sup>* larvae with and without dorsal lesions. Note that the ones with lesions  
413 are significantly higher than the ones without lesions.

414 **The JNK mediated Dpp pathway is regulated by *Rab11* and *lgl* interaction during embryonic**  
415 **dorsal closure process**

416 The JNK mediated Dpp signaling in the dorsolateral epithelium of stage 13-14 embryos of  
417 *Drosophila* is critical for the successful execution of the dorsal closure process. Inferring from our  
418 previous observations it can be safely stated that the genetic interplay of *Rab11* and *lgl* could be  
419 an important regulatory mechanism in this process which could further affect the JNK-Dpp  
420 pathway in the dorsolateral epithelial cells. In order to assess the effects of the *lgl-Rab11*  
421 interaction on the JNK signaling process, a transgenic JNK biosensor stock (*TRE-DsRed* also  
422 known as TRE-JNK) was duly introgressed with *pnr-Gal4*, thereby generating *TRE-JNK*; *pnr-*  
423 *Gal4* stock. As reported by Chatterjee and Bohmann, 2012, a transcriptional reporter expressing  
424 DsRED on activation of JNK pathway was constructed and inserted on the second chromosome  
425 by the  $\phi$ C31 based technique where the activation of c-JUN-FOS or AP1 transcription factor and  
426 its binding to TRE can be monitored by TRE (TPA responsive element) dependent DsRed

427 expression, which provides an excellent system for monitoring JNK activity in the tissue under  
428 study and hence is an ideal bio-sensor of JNK signaling pathway.

429 Using this very biosensor, JNK activity was monitored in the background of different *UAS*  
430 constructs of *Rab11* and *lgl* driven by *pnr*<sup>MD237</sup>. It was observed that JNK patterns were indeed  
431 perturbed under different genetic backgrounds of *Rab11* and *lgl*. The improper expression patterns  
432 of JNK under the influence of different alleles could be a cause of the different morphological  
433 defects observed in each case. Not only JNK is altered differentially in different *pnr-Gal4* driven  
434 *UAS* constructs of *Rab11*<sup>RNAi</sup> and *lgl*<sup>RNAi</sup>, the rescue which we observe in case of *pnr-Gal4* driven  
435 *UAS-Rab11*<sup>RNAi</sup>, *UAS-lgl*<sup>RNAi</sup> individuals is also seen in terms of JNK signaling pattern, where both  
436 the *RNAi* driven individuals show an expression pattern similar to the wild type conditions whereas  
437 on the other hand, a *pnr-Gal4* driven *UAS-Rab11*<sup>CA</sup>; *UAS-lgl*<sup>RNAi</sup> shows aggravated JNK signaling  
438 pattern (Fig. 6D-D' & C-C').

439

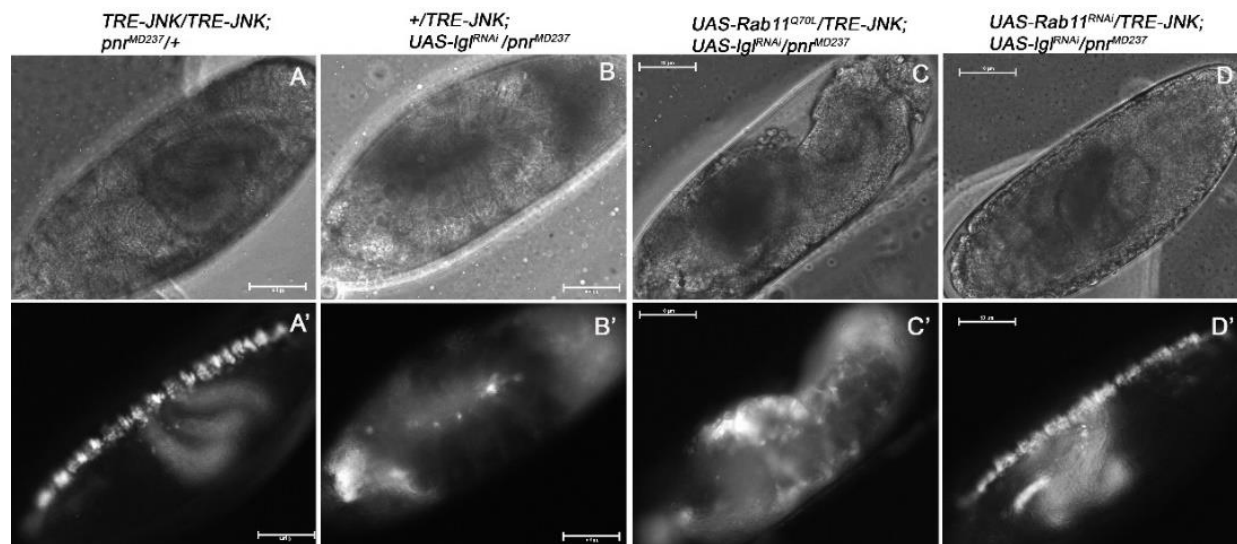

441 **Fig 6:** Phase contrast and Fluorescence images of 13-14h old *Drosophila* embryos in different  
442 genetic backgrounds of *pnr-Gal4* undriven (A-A'), *pnr-Gal4* driven *UAS-lgl<sup>RNAi</sup>* (B-B'), *pnr-Gal4*  
443 driven *UAS-YFP-Rab11<sup>Q70L</sup>*; *UAS-lgl<sup>RNAi</sup>* (C-C') and *pnr-Gal4* driven *UAS-Rab11<sup>RNAi</sup>*; *UAS-*  
444 *lgl<sup>RNAi</sup>* (D-D') genetic backgrounds. 13-14 h developed embryos were observed which signifies the  
445 completion of the dorsal closure stage in all the above shown genetic backgrounds. Note the  
446 significant down-regulation of JNK signal in B' as compared to A' and D'. At the same time Rab11  
447 when overexpressed in a *pnr-Gal4* driven *UAS-lgl<sup>RNAi</sup>* background (C'), results in an  
448 upsurge of JNK signal signifying the effect of *Rab11* and *lgl* interaction on the JNK signaling  
449 pathway in the dorso-lateral epidermis of the developing embryos. The affected embryos in B' and  
450 C' show dorsal closure defects as reported in the earlier results.

451 ***Rab11* and *lgl* mutants affect Dpp signaling (downstream of JNK) during dorsal closure in**  
452 ***Drosophila* embryos**

453 JNK precedes Dpp signaling in the process of dorsal closure. Dpp or TGF- $\beta$  is a morphogen  
454 essentially required for the regulation of downstream SMAD signaling which brings about cell  
455 morphology changes necessary to shape and guild tissue architecture at the time of development  
456 and differentiation. Thus in order to observe the effects of *Rab11* and *lgl* mutants in the JNK  
457 mediated Dpp signaling, we used a *Dpp-LacZ* reporter assay in order to assess the effects of these  
458 mutants in the process of dorsal closure. *Dpp-LacZ/CyO-Act-GFP*; *pnr<sup>MD237</sup>/TM3-Act-GFP* stock  
459 was used as a driver of *UAS-Rab11<sup>RNAi</sup>*; *UAS-lgl<sup>RNAi</sup>* (A-A''), *UAS-lgl<sup>RNAi</sup>* (B-B'') and *UAS-*  
460 *Rab11<sup>RNAi</sup>* (C-C'') stocks, with undriven stock as control (D-D''). It was observed that, in controls  
461 (D-D'') a strong Dpp signaling occurs in the region of the leading edge cells which is sustained  
462 even after the completion of dorsal closure process as evident from the two parallel blue lines seen  
463 on the dorsal region of the embryo (D). However, this gets disrupted in *pnr-Gal4* driven *UAS-*



464 *lgl<sup>RNAi</sup>* or *UAS-Rab11<sup>RNAi</sup>* conditions as observed in figures B and C, respectively, despite of the  
465 fact, a mild expression of Dpp exists at the time of dorsal closure process (B'-B'' and C'-C''),  
466 though, not as robust as compared to the undriven controls (D'-D''). A somewhat rescue of the  
467 same is observed in *pnr-Gal4* driven *UAS-Rab11<sup>RNAi</sup>*; *UAS-lgl<sup>RNAi</sup>* individuals (A-A'') which could  
468 be due to the restoration of the normal JNK signaling pattern as shown in the previous results.

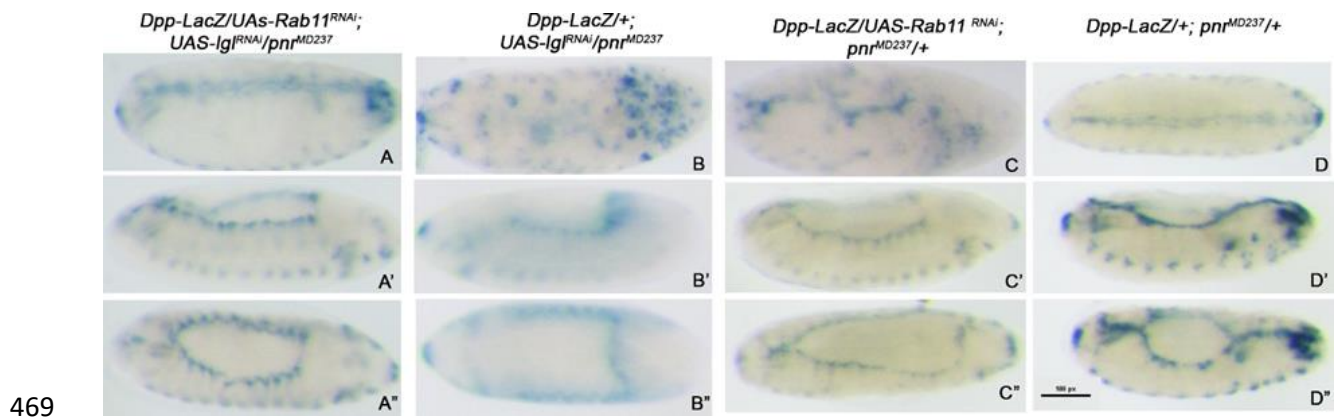

470 **Fig 7:** Bright field images of Lac-Z stained embryos under different genetic backgrounds, viz., *pnr-*  
471 *Gal4* driven *UAS-Rab11<sup>RNAi</sup>*; *UAS-lgl<sup>RNAi</sup>* (A-A''), *pnr-Gal4* driven *UAS-lgl<sup>RNAi</sup>* (B-B''), *pnr-Gal4*  
472 driven *UAS-Rab11<sup>RNAi</sup>* (C-C'') and undriven (D-D'') controls. The expression pattern of Lac-Z  
473 indicates Dpp expression pattern in the leading edge of the lateral epithelia of individual embryos.  
474 Observe the rescue in A-A'' as compared to B-B'' or C-C'' panels which represents the restoration  
475 of proper Dpp signaling pattern on the down-regulation of *Rab11* in the *lgl* knockdown condition.

#### 476 **Discussion:**

477 The dorsal closure event signifies the gastrulation event in the fly embryos and is unique in the  
478 sense that it involves an extensive amount of coordinated cell shape changes exhibited by the  
479 contralaterally extending LE which finally zipper the dorsal opening of the germ band retracted  
480 embryo. As the LE extends, the constituent dorsal most and the dorsolateral cells undergo

481 dorsoventral elongations which helps the lateral epidermis on either side extend and cover up the  
482 amnioserosa. Thus it is evident that the cell shape changes observed at the time of epithelial tissue  
483 extensions are highly polarized or directional. This property of the constituent cells is achieved on  
484 account of spatial cues which can be external, like the secreted morphogens; or internal, such as  
485 cytoplasmic morphogens or cell-polarity determining proteins. The cell-polarity determining  
486 proteins draw specific interest as they have been rigorously reported to be regulating intracellular  
487 cytoskeletal rearrangements and dynamics which is responsible for imparting cells their cognate  
488 shapes whereas on the other hand they also regulate critically important cell signaling pathways  
489 such as the JNK-Dpp pathway which in turn regulate the cytoskeletal dynamics as well as cell  
490 polarity. However, the mechanisms which intervene between cell polarity and cell signaling still  
491 remains an enigma even though an enormous amount of data has been generated in an attempt to  
492 join the two.

493 In the present study, we have tried to dissect a probable mechanism employed by the tumour  
494 suppressor, *lgl*, in developmental morphogenesis as has been reported by Manfruelli et al, 1996  
495 where temperature sensitive, loss of function mutations of the gene show a characteristic dorsal  
496 open phenotype. This proves the instrumental role of the *lgl* in the process of wound healing which  
497 is popular as a component of the baso-lateral cell polarity complex along with Scribble and Dlg.  
498 However the cellular mechanisms which *lgl* regulates in order to accomplish the dorsal closure  
499 process yet remains to be answered although there are reliable evidences suggesting their profound  
500 effects on intra-cellular vesicle transport, cytoskeletal dynamics and cell signaling. In our  
501 experiments we find that *lgl* regulates spatio temporal expression pattern of Rab11, a small Ras  
502 like GTPase, which is essential for recycling cargo from Recycling Endosomes and the Trans  
503 Golgi Network to the plasma membrane. Reports of Sasikumar and Roy, 2009 and Mateus et al,

504 2011 suggest and demonstrate Rab11's instrumental role in the dorsal closure process. The former  
505 group, i.e. Sasikumar and Roy have shown the effects of the loss of function allele, *Rab11<sup>EP3017</sup>*,  
506 in the DLE cells which fail to show proper cell morphologies along with the LE cells whereas  
507 Mateus et al, 2011 report its interaction with the early endosome Rab, Rab5 in the process of dorsal  
508 closure, where it is responsible for DE-Cadherin recycling in the LE cells at the time of dorsal  
509 closure.

510 These findings intrigued us to assess the interaction between *lgl* and *Rab11*, as their mutants show  
511 overlapping dorsal open phenotypes much like the mutants of the components of JNK pathway,  
512 like basket, slipper or puckered (Fig. 1). Reports of Zhang et al, 2005 and Langevin et al, 2005,  
513 suggest that *lgl* could be regulating polarized exocytosis by interacting with the components of the  
514 exocyst pathway, many of which also happen to be physical interactors of Rab11. Deriving cues  
515 from this information and exploiting the robust genetics of the *Gal4-UAS* system of targeted gene  
516 expression (Brand and Perrimon, 1993), a study on the effects of an ectopic perturbation of *lgl* in  
517 the DLE using *pnr-Gal4* (Kushnir et al, 2017) was made, where a down-regulation of *lgl* transcripts  
518 in *pnr-Gal4* driven *UAS-lgl<sup>RNAi</sup>* individuals showed characteristic dorsal opening and puckering of  
519 embryonic cuticle as shown by *lgl<sup>TS3</sup>* homozygotes reported by Manfruelli et al, 1996 (Fig. 1). Such  
520 cuticular aberrations appear due to inability of the cells of the LE to elongate and expand dorso-  
521 ventrally. This was further confirmed as we tracked these morphological changes in different  
522 genetic backgrounds of *pnr-Gal4* driven *UAS-lgl<sup>RNAi</sup>* and *pnr-Gal4* driven *UAS-bsk<sup>DN</sup>* where cells  
523 of the dorsolateral epithelium do not show the usual elongations as observed in an undriven  
524 background (Fig. 2). These cells are the ones which typically undergo JNK signaling responsible  
525 for the production and exocytosis of the Dpp morphogen (Zeitlinger et al, 1997 and Kushnir et al  
526 2017) where Dpp in turn induces cell shape changes through its effects on the intracellular

527 cytoskeletal dynamics. An interesting observation was made by Arquier et al, 2001, where *lgl* has  
528 been shown to regulate the emission of Dpp signal and thereby influencing dorsal closure process.  
529 Our observations in Fig. 7B-B'' supports this finding but the mechanism via which *lgl* is able to  
530 regulate the release of Dpp morphogen yet needs to be addressed, although we prove here that a  
531 simultaneous knockdown of Rab11 in a *pnr-Gal4* driven *UAS-lgl<sup>RNAi</sup>* background restores the Dpp  
532 expression pattern which is otherwise lost when *UAS-Rab11<sup>RNAi</sup>* or *UAS-lgl<sup>RNAi</sup>* are individually  
533 driven by *pnr-Gal4*.

534 These observations as well as clues from available literature intrigued us to speculate into a  
535 probable role of *Rab11* in the functional aspects of *lgl* which it performs in the dorsal closure  
536 process where both *Rab11* loss of function mutants (Sasikumar and Roy, 2009) and *lgl* loss of  
537 function mutants show overlapping phenotypes. With standard genetic approaches, we indeed  
538 observed that *lgl* does synergize with *Rab11* in the dorsal closure process which we could trace at  
539 cellular levels (Fig 3 a). Our lethality assay results (Fig. 3b) also suggest that a strong interaction  
540 exists between *Rab11* and *lgl*. We observed that in a *pnr-Gal4* driven *UAS-lgl<sup>RNAi</sup>* condition,  
541 20.36% lethality was observed whereas on the other hand in a *pnr-Gal4* driven *UAS-Rab11<sup>RNAi</sup>*;  
542 *UAS-lgl<sup>RNAi</sup>* background a lethality of 1.7% was observed which is a remarkable rescue. On the  
543 contrary, in a *pnr-Gal4* driven *UAS-YFP-Rab11<sup>Q70L</sup>*; *UAS-lgl<sup>RNAi</sup>* background lethality values  
544 staggered up to 54.82% which suggests an aggravation of lethal phenotype. These observations  
545 could arise due to a regulatory effect of *lgl* on *Rab11* expression which has also been reported by  
546 Parsons et al, 2014 where *lgl<sup>-/-</sup>* clones showed a characteristic accumulation of cytoplasmic Rab11.  
547 Our results in Fig. 4, corroborates this finding as in a *pnr-Gal4* driven *UAS-lgl<sup>RNAi</sup>* background  
548 Rab11 expression levels get augmented in the dorso lateral epithelium with a consequent loss of  
549 the constituent cell shape and polarity. Interestingly, a Rab11 over-expression in a *pnr-Gal4* driven

550 *UAS-YFP-Rab11<sup>Q70L</sup>* embryos does not show a significant lethality which indicates the synergism  
551 and complementarities between the two loci required at the time of dorsal closure.

552 An interesting observation was also made at the larval stages of *lgl* and *Rab11* introgressed flies  
553 (Fig. 5a), where individually driven (by *pnr-Gal4* or *pnr<sup>MD237</sup>*) *UAS-lgl<sup>RNAi</sup>* or *UAS-Rab11<sup>RNAi</sup>*  
554 larvae (the ones which do not undergo embryonic death) do not show dorsal lesions but perish as  
555 early embryos or pupae during thorax closure. However, the *pnr-Gal4* driven *UAS-Rab11<sup>RNAi</sup>*;  
556 *UAS-lgl<sup>RNAi</sup>* individuals emerge in large numbers (Fig.5b) (justifying our embryonic lethality  
557 rescue experiments) amongst which a large fraction of larvae show characteristic dorsal lesions  
558 (Fig. 5 a) throughout the dorsal axis of the larvae. These lesions develop due to the partial rescue  
559 of dorsal closure defects which *UAS-Rab11<sup>RNAi</sup>* or *UAS-lgl<sup>RNAi</sup>* individually show when driven by  
560 *pnr-Gal4* (Fig. 5d). However, these larvae fail to develop into fully formed flies and show drastic  
561 thorax closure defects. The larvae which do not show these lesions develop into fully grown adults  
562 with properly formed thoraces which is also indicated from fly eclosion assay (Fig. 5c). A reason  
563 for this could be the different physiologies of the embryonic epithelium and the wing disc  
564 epithelium although they are executing parallel events of dorsal closure and thorax closure,  
565 respectively, governed by the same JNK-Dpp pathway. These observations suggest that *Rab11*  
566 and the tumour suppressor *lgl* interact in order to establish dorsal closure in the developing fly  
567 embryos. However the similarity of the genetic interaction between *lgl* and *Rab11* in both the  
568 dorsal closure and thorax closure processes is remarkable as both these events require a robust  
569 JNK-Dpp signaling at the migrating fronts of the contralaterally expanding epithelia.

570 As both the events of dorsal closure and thorax closure in *Drosophila* are carried out under the  
571 robust influence of JNK-Dpp expression (Agnes et al, 1999), it became imperative to analyze the  
572 effects of the genetic interaction of *Rab11* and *lgl* on the same. Therefore, in vivo reporters were

573 resorted to in order to address this issue, where, TRE activated Ds-RED and LacZ reporter assays  
574 were employed to monitor the JNK and Dpp expression pattern in various genetic backgrounds of  
575 *Rab11* and *lgl* (Fig. 6 and Fig. 7). Reports of Escovar-Riesgo, 1997 and Fernandez, 2007, suggests  
576 that JNK–Dpp signaling promotes necessary coordinated cell shape changes required for dorsal  
577 closure which we could confirm in our observations (Supplementary figure 4 and 5). Significant  
578 alterations from the regular signaling pattern could be visible in the *pnr-Gal4* driven *UAS-lgl<sup>RNAi</sup>*  
579 conditions (Fig 6-B' and Fig. 7-B, B' and B'') where JNK signaling as well as corresponding Dpp  
580 signaling is lowered as compared to the wild type conditions. JNK signaling shows a drastic down-  
581 regulation whereas Dpp signaling appears sparse as compared to the wild type. However, the  
582 rescue observed is significant as normal JNK and Dpp expression pattern is restored in a *pnr-Gal4*  
583 driven *UAS-Rab11<sup>RNAi</sup>; UAS-lgl<sup>RNAi</sup>* genetic background (Fig. 6 D' and Fig. 7 A). According to  
584 Arquier, 2001, *lgl* regulates the emission of Dpp morphogen in the embryonic epidermis. It could  
585 be that elevated Rab11 levels in *pnr-Gal4* driven *UAS-lgl<sup>RNAi</sup>* background could interfere with the  
586 exocytosis of Dpp morphogen needed for necessary cell shape changes which when brought down  
587 to normal levels result in a regular pattern of Dpp signaling.

588 The above observations make it evident that Rab11 could be playing essential roles in *lgl* mediated  
589 epithelial morphogenesis. *lgl* mutations have been rigorously reported to be causing neoplastic  
590 epithelial tumours in *Drosophila* (Grifoni et al, 2013) and its roles in human cancers have been  
591 well documented by Schimanski et al, 2005 and Tsuruga et al ,2007. In their landmark review  
592 Schafer and Werner, 2008 suggest several parallels between the wound healing process and  
593 cancers which include TGF $\beta$  receptor induced SMAD signaling, which is also observed in our  
594 experiments. Using the dorsal closure of *Drosophila* as a model of wound healing, we could  
595 demonstrate that coordinated cell shape changes and contralateral fusion of epithelia requires the

596 synergism between loci, which individually regulate cell polarity and intracellular recycling as we  
597 show the dorsal cuticular lesions of third instar larvae in a *pnr-Gal4* driven *UAS-Rab11<sup>RNAi</sup>*; *UAS-*  
598 *lgl<sup>RNAi</sup>* background for the very first time (Fig. 5). Based on these observations it would further be  
599 interesting to dissect the mechanisms via which the tumour suppressor *lgl* could be regulating  
600 Rab11 expression pattern and consequent cell signaling of epithelial tissues, in order to exert its  
601 effects in developmental or diseased contexts.

## 602 **Acknowledgements:**

603 We thank the fly community for generously providing fly stocks. Special acknowledgements to  
604 Professor B. J. Rao for providing the TRE-JNK/CyO fly stock. We duly acknowledge the National  
605 facility for Laser Scanning Confocal Microscopy, Department of Zoology, Banaras Hindu  
606 University. The financial support of DST-FIST, UGC-UPE and CAS Zoology are duly  
607 acknowledged. We sincerely acknowledge the pioneering work of Dr. Satish Sasikumar, 2009,  
608 which suggested the role of Rab11 in epithelial morphogenesis. We sincerely thank University  
609 Grants Commission, New Delhi and Indian Council of Medical Research, New Delhi for providing  
610 the fellowships to NN.

611

612

## **References:**

Agnès F, Suzanne, M and Noselli S. 1999. The *Drosophila* JNK pathway controls the morphogenesis of imaginal discs during metamorphosis. *Development* **126**:5453-5462.

Anderson KV, Jürgens G and Nüsslein-Volhard C. 1985. Establishment of dorsal-ventral polarity in the *Drosophila* embryo: genetic studies on the role of the Toll gene product. *Cell* **42**:779-789.



Arquier N, Perrin L, Manfruelli P and Sémériva M, 2001. The *Drosophila* tumor suppressor gene *lethal (2) giant larvae* is required for the emission of the Decapentaplegic signal. *Development* **128**:2209-2220.

Banerjee A and Roy JK. 2017. Dicer-1 regulates proliferative potential of *Drosophila* larval neural stem cells through bantam miRNA based down-regulation of the G1/S inhibitor Dacapo. *Dev Biol* **423**:57-65.[doi:10.1016/j.ydbio.2017.01.011](https://doi.org/10.1016/j.ydbio.2017.01.011)

Bhuin T and Roy JK. 2012. Rab11 is required for maintenance of cell shape via  $\beta$ PS integrin mediated cell adhesion in *Drosophila*. *Int J Mol Med*, **1**:185.

Bilder D, Li M and Perrimon N. 2000. Cooperative regulation of cell polarity and growth by *Drosophila* tumor suppressors. *Science* **289**:113-116.[doi: 10.1126/science.289.5476.113](https://doi.org/10.1126/science.289.5476.113)

Brand AH and Perrimon N. 1993. Targeted gene expression as a means of altering cell fates and generating dominant phenotypes. *Development* **118**:401-415.

Calleja M, Herranz H, Estella C, Casal J, Lawrence P, Simpson P and Morata G. 2000. Generation of medial and lateral dorsal body domains by the pannier gene of *Drosophila*. *Development* **127**:3971-3980.

Cao J, Albertson R, Riggs B, Field CM and Sullivan W. 2008. Nuf, a Rab11 effector, maintains cytokinetic furrow integrity by promoting local actin polymerization. *J Cell Biol* **182**:301-313.[doi: 10.1083/jcb.200712036](https://doi.org/10.1083/jcb.200712036)

Chatterjee N and Bohmann D. 2012. A versatile  $\Phi$ C31 based reporter system for measuring AP-1 and Nrf2 signaling in *Drosophila* and in tissue culture. *PLoS One* **7**:34063.[doi:10.1371/journal.pone.0034063](https://doi.org/10.1371/journal.pone.0034063)

Enomoto M and Igaki T. 2011. Deciphering tumor-suppressor signaling in flies: genetic link between Scribble/Dlg/Lgl and the Hippo pathways. *J Genet* **38**:461-470.[doi:10.1016/j.jgg.2011.09.005](https://doi.org/10.1016/j.jgg.2011.09.005)

Fernández BG, Arias AM and Jacinto A. 2007. Dppsignalling orchestrates dorsal closure by regulating cell shape changes both in the amnioserosa and in the epidermis. *Mech Dev* **124**:884-897. [doi:10.1016/j.mod.2007.09.002](https://doi.org/10.1016/j.mod.2007.09.002)

Green P, Hartenstein AY and Hartenstein V. 1993. The embryonic development of the *Drosophila* visual system. *Cell Tissue Res* **273**:583-598.

Grifoni D, Froidi F and Pession A. 2013. Connecting epithelial polarity, proliferation and cancer in *Drosophila*: the many faces of *lgl* loss of function. *Int J Dev Biol* **57**:677-687.[doi: 10.1387/ijdb.130285dg](https://doi.org/10.1387/ijdb.130285dg)

Hariharan IK and Bilder D. 2006. Regulation of imaginal disc growth by tumor-suppressor genes in *Drosophila*. *Annu Rev Genet* **40**:335-361. [doi:10.1146/annurev.genet.39.073003.100738](https://doi.org/10.1146/annurev.genet.39.073003.100738)



Humbert PO, Grzeschik NA, Brumby AM, Galea R, Elsum I and Richardson HE. 2008. Control of tumorigenesis by the Scribble/Dlg/Lgl polarity module. *Oncogene* **27**:6888. doi:10.1038/onc.2008.341

Humbert P, Russell S and Richardson H. 2003. Dlg, Scribble and Lgl in cell polarity, cell proliferation and cancer. *Bioessays* **25**:542-553. doi:10.1002/bies.10286

Hutterer A, Betschinger J, Petronczki M and Knoblich JA. 2004. Sequential roles of Cdc42, Par-6, aPKC, and Lgl in the establishment of epithelial polarity during *Drosophila* embryogenesis. *Dev Cell* **6**:845-854. doi:10.1016/j.devcel.2004.05.003

Klezovitch O, Fernandez TE, Tapscott SJ and Vasioukhin V. 2004. Loss of cell polarity causes severe brain dysplasia in Lgl1 knockout mice. *Genes Dev* **18**:559-571. doi:10.1101/gad.1178004.

Kushnir T, Mezuman S, Bar-Cohen S, Lange R, Paroush ZE and Helman A. 2017. Novel interplay between JNK and Egfr signaling in *Drosophila* dorsal closure. *PLoS Genet* **13**:1006860. doi:10.1371/journal.pgen.1006860

Langevin J, Morgan MJ, Rossé C, Racine V, Sibarita JB, Aresta S, Murthy M, Schwarz T, Camonis J and Bellaïche Y. 2005. *Drosophila* exocyst components Sec5, Sec6, and Sec15 regulate DE-Cadherin trafficking from recycling endosomes to the plasma membrane. *Dev Cell* **9**:365-376. doi.org:10.1016/j.devcel.2005.07.013

Langevin J, Le Borgne R, Rosenfeld F, Gho M, Schweisguth F and Bellaïche Y. 2005. Lethal giant larvae controls the localization of notch-signaling regulators numb, neuralized, and Sanpodo in *Drosophila* sensory-organ precursor cells. *Curr Biol*, **15**:955-962. doi:10.1016/j.cub.2005.04.054

Manfruelli P, Arquier N, Hanratty WP and Semeriva M. 1996. The tumor suppressor gene, *lethal (2) giant larvae (1 (2) gl)*, is required for cell shape change of epithelial cells during *Drosophila* development. *Development* **122**: 2283-2294.

Mateus AM, Gorfinkiel N, Schamberg S and Arias AM. 2011. Endocytic and recycling endosomes modulate cell shape changes and tissue behaviour during morphogenesis in *Drosophila*. *PloS one*, **6**:18729. doi:10.1371/journal.pone.0018729

Narasimha M and Brown NH. 2006. Confocal Microscopy of *Drosophila* Embryos. *In Cell Biology* 77-86. *Academic Press*. doi:10.1016/B978-012164730-8/50136-2

Noselli S and Agnès F. 1999. Roles of the JNK signaling pathway in *Drosophila* morphogenesis. *Curr Opin Genetics Dev* **9**:466-472. doi:10.1016/S0959-437X(99)80071-9

Noselli S. 1998. JNK signaling and morphogenesis in *Drosophila*. *Trends Genet* **14**:33-38. doi:10.1016/S0168-9525(97)01320-6

Parsons LM, Portela M, Grzeschik NA and Richardson HE. 2014. Lgl regulates Notch signaling via endocytosis, independently of the apical aPKC-Par6-Baz polarity complex. *Curr Biol*, **24**:2073-2084. doi:10.1016/j.cub.2014.07.075

Peng CY, Manning L, Albertson R and Doe CQ. 2000. The tumour-suppressor genes *lgl* and *dlg* regulate basal protein targeting in *Drosophila* neuroblasts. *Nature* **408**:596.

Perkins LA, Holderbaum L, Tao R, Hu Y, Sopko R, McCall K, Yang-Zhou D, Flockhart I, Binari R, Shim HS and Miller A. 2015. The transgenic RNAi project at Harvard Medical School: resources and validation. *Genetics* **201**:843-852. doi:10.1534/genetics.115.180208

Rämet M, Lanot R, Zachary D and Manfrulli P. 2002. JNK signaling pathway is required for efficient wound healing in *Drosophila*. *Dev Biol*, **241**:145-156. doi:10.1006/dbio.2001.0502

Ray M and Lakhota SC. 2015. The commonly used eye-specific sev-GAL4 and GMR-GAL4 drivers in *Drosophila melanogaster* are expressed in tissues other than eyes also. *J Genet* **94**:407-416.

Riesgo-Escovar JR and Hafen E. 1997. *Drosophila* Jun kinase regulates expression of decapentaplegic via the ETS-domain protein Aop and the AP-1 transcription factor DJun during dorsal closure. *Genes Dev* **11**:1717-1727. doi:10.1101/gad.11.13.1717

Royer C and Lu X. 2011. Epithelial cell polarity: a major gatekeeper against cancer? *Cell Death Differ* **18**:1470. doi:10.1038/cdd.2011.60

Sasikumar S and Roy JK. 2009. Developmental expression of Rab11, a small GTP-binding protein in *Drosophila* epithelia. *Genesis* **47**:32-39. doi:10.1002/dvg.20441

Satoh AK, O'Tousa JE, Ozaki K and Ready DF. 2005. Rab11 mediates post-Golgi trafficking of rhodopsin to the photosensitive apical membrane of *Drosophila* photoreceptors. *Development* **132**:1487-1497. doi: 10.1242/dev.01704

Schäfer M and Werner S. 2008. Cancer as an overhealing wound: an old hypothesis revisited. *Nature Rev Mol Cell Biol* **9**:628. doi:10.1038/nrm2455

Schimanski CC, Schmitz G, Kashyap A, Bosserhoff AK, Bataille F, Schäfer SC, Lehr HA, Berger MR, Galle PR, Strand S and Strand D. 2005. Reduced expression of Hugl-1, the human homologue of *Drosophila* tumour suppressor gene *lgl*, contributes to progression of colorectal cancer. *Oncogene* **24**:3100. doi:10.1038/sj.onc.1208520

Stronach B and Perrimon N. 2002. Activation of the JNK pathway during dorsal closure in *Drosophila* requires the mixed lineage kinase, slipper. *Genes Dev* **16**:377-387. doi:10.1101/gad.953002

Sun G and Irvine KD. 2011. Regulation of Hippo signaling by Jun kinase signaling during compensatory cell proliferation and regeneration, and in neoplastic tumors. *Dev Biol* **350**:139-151. doi:10.1016/j.ydbio.2010.11.036

Tanentzapf G and Tepass U. 2003. Interactions between the crumbs, lethal giant larvae and bazooka pathways in epithelial polarization. *Nature Cell Biol* **5**:46. doi: 10.1038/ncb896

Thomas C, Rousset R and Noselli S. 2009. JNK signalling influences intracellular trafficking during *Drosophila* morphogenesis through regulation of the novel target gene Rab30. *Dev Biol* **331**:250-260. doi:10.1016/j.ydbio.2009.05.001

Tsuruga T, Nakagawa S, Watanabe M, Takizawa S, Matsumoto Y, Nagasaka K, Sone K, Hiraike H, Miyamoto Y, Hiraike O and Minaguchi T. 2007. Loss of Hugl-1 expression associates with lymph node metastasis in endometrial cancer. *Oncol Res* **16**:431-435. doi:10.3727/000000007783980855

Wu S, Mehta SQ, Pichaud F, Bellen HJ and Quioco FA. 2005. Sec15 interacts with Rab11 via a novel domain and affects Rab11 localization in vivo. *Nature Struct Biol* **12**:879. doi:10.1038/nsmb987

Zeitlinger J, Kockel L, Peverali FA, Jackson DB, Mlodzik M and Bohmann D. 1997. Defective dorsal closure and loss of epidermal decapentaplegic expression in *Drosophila* mutants. *EMBO J* **16**:7393-7401.

Zhang X, Wang P, Gangar A, Zhang J, Brennwald P, TerBush D and Guo W. 2005. Lethal giant larvae proteins interact with the exocyst complex and are involved in polarized exocytosis. *J Cell Biol*. **170**:273-283. doi: 10.1083/jcb.200502055

Zhu M, Xin T, Weng S, Gao Y, Zhang Y, Li Q and Li M. 2010. Activation of JNK signaling links *lgl* mutations to disruption of the cell polarity and epithelial organization in *Drosophila* imaginal discs. *Cell Res* **20**:242. doi: 10.1038/cr.2010.2

### **Supplementary Data 1 (S 1):**

#### **Embryo selection scheme for immunofluorescence and expression analysis**

##### **experiments:**

In order to distinguish between the *Gal4* driven and undriven embryos, *pnr-Gal4* was balanced with *TM3*, *Act-GFP*, *Ser1* and homozygous *UAS-lgl<sup>RNAi</sup>* or *UAS-Rab11<sup>RNAi</sup>*; *UAS-lgl<sup>RNAi</sup>* individuals were introgressed with this *Gal4* stock. The embryos so obtained were mounted in Halo-Carbon oil and observed under the fluorescence microscope (Nikon eclipse E800). A clear rescue of *pnr-Gal4* driven *UAS-Rab11<sup>RNAi</sup>*; *UAS-lgl<sup>RNAi</sup>* individuals along with the lethality of *pnr-Gal4* driven *UAS-lgl<sup>RNAi</sup>* was observed.

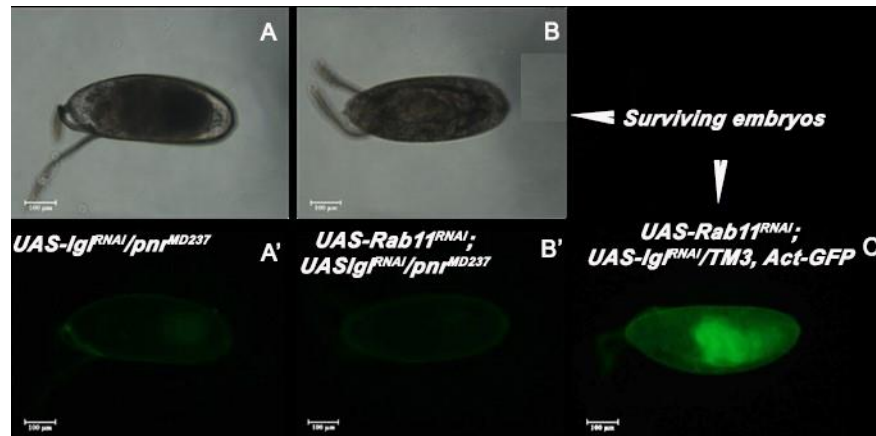

**Fig. S1:** Phase contrast and Fluorescence images of 22-24 h developed fly embryos in *pnr-Gal4* driven *UAS-Igf<sup>RNAi</sup>* background (A-A'), *UAS-Rab11<sup>RNAi</sup>;UAS-Igf<sup>RNAi</sup>* background ( B-B') and balancer *TM3, Act-GFP, Ser1* containing embryos (C'). Note that the GFP negative embryos which are driven with *pnr-Gal4* show their respective phenotypes whereas the GFP positive embryos hatch out and continue on a normal developmental program.

**Supplementary Data2 (S2) For fig. 7:**

Lac Z reporter assay in undriven or wild type genetic background.

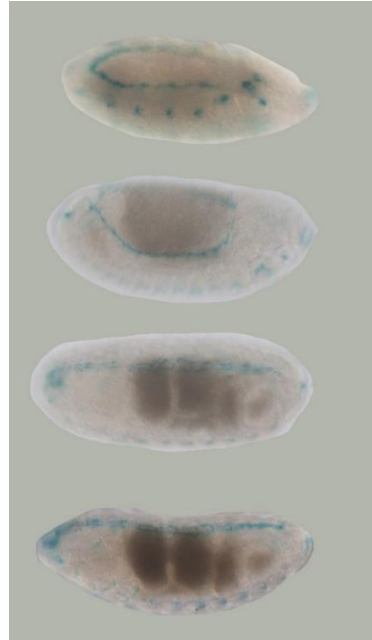

**Fig. S2:** Lac Z reporter assay showing Dpp expression in different stages of development in a *pnr-Gal4/+* (undriven) genetic background. The same protocol has been used to stain the embryos shown in Fig. 7. Note the robust expression pattern of Dpp in the leading edge from the germ band extended to completion of dorsal closure stages.

**Supplementary data 3 (S3) For fig 6:**

JNK activity as seen through RFP expression in different stages of dorsal closure in a wild type genetic background.

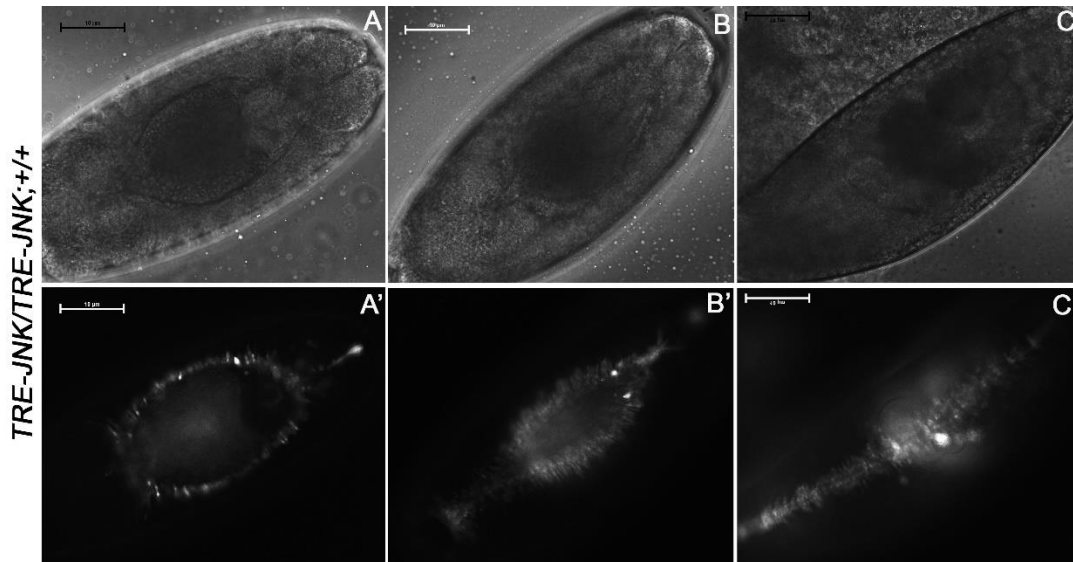

**Fig. S3:** Phase contrast (A-C) and Fluorescence microscope (A'-C') images of late 13 , late14 and late 15 stages of *TRE-JNK; +* genotype embryos, showing JNK activity during the process of Dorsal closure. Observe the continual fluorescence expression in the cells of the Leading Edge and the dorsolateral epithelium which undergo morphological changes in order to complete the dorsal closure process.

**Supplementary data 4 (S4) demonstrating effects on Rab11 protein content in *pnr-Gal4* driven *UAS-Rab11<sup>RNAi</sup>* individuals**

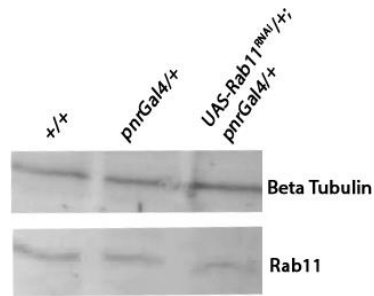

**Fig. S 4:** Western blot showing the effect of *pnr-Gal4* driven *UAS-Rab11<sup>RNAi</sup>* on Rab11 protein levels. Note the decline in protein quantity in the third lane from left. This suggests the effective activity of the *UAS-Rab11<sup>RNAi</sup>* stock used in the experiment

**Supplementary table T1 in support of Fig 3b.**

| Cross scheme                                                                                                 | Total fertilized | Dead | Total Death % (Dt) | Death% in controls (Due to balancers) (Dc) | Actual Death % in driven progeny (Da) | Fraction of driven progeny (According to Mendelian ratios) | Death % in 100% driven individuals |
|--------------------------------------------------------------------------------------------------------------|------------------|------|--------------------|--------------------------------------------|---------------------------------------|------------------------------------------------------------|------------------------------------|
| <i>pnr<sup>MD237/TM3,Ser</sup></i><br>X<br>+/CyO                                                             | 167              | 4    | 2.39(Control I)    |                                            | 2.39                                  |                                                            | 2.39                               |
| <i>pnr<sup>MD237/TM3,Ser</sup></i><br>X<br>+/+                                                               | 158              | 3    | 1.39(Control II)   |                                            | 1.39                                  | 0.5                                                        | 2.78                               |
| <i>pnr<sup>MD237/TM3,Ser</sup></i><br>X<br>+;+/CyO-Tb                                                        | 109              | 62   | 56.39(Control III) |                                            | 56.39                                 | 0.25                                                       | 56.39                              |
| <i>pnr<sup>MD237/TM3,Ser</sup></i><br>X<br><i>UAS-Rab11<sup>RNAi</sup></i>                                   | 402              | 37   | 9.2                | 1.39 (Control II)                          | 7.81                                  | 0.5                                                        | 15.62                              |
| <i>pnr<sup>MD237/TM3,Ser</sup></i><br>X<br><i>UAS-Rab11<sup>Q70L</sup>/CyO</i>                               | 218              | 6    | 2.75               | 2.39 (Control I)                           | 0.36                                  | 0.25                                                       | 1.44                               |
| <i>pnr<sup>MD237/TM3,Ser</sup></i><br>X<br><i>UAS-YFP-Rab11<sup>Q70L</sup>;UAS-Igl<sup>RNAi</sup>/CyO-Tb</i> | 418              | 293  | 70.09              | 56.39(Control III)                         | 13.71                                 | 0.25                                                       | 54.82                              |
| <i>pnr<sup>MD237/TM3,Ser</sup></i><br>X<br><i>UAS-Rab11<sup>RNAi</sup>;UAS-Igl<sup>RNAi</sup></i>            | 491              | 11   | 2.24               | 1.39 (Control II)                          | 0.85                                  | 0.5                                                        | 1.7                                |
| <i>pnr<sup>MD237/TM3,Ser</sup></i><br>X<br><i>UAS-Igl<sup>RNAi</sup></i>                                     | 389              | 45   | 11.57              | 1.39 (Control II)                          | 10.18                                 | 0.5                                                        | 20.36                              |



Supplementary table T2 in support of fig. 5c

| <u>Cross scheme</u>                                                                                                               | <u>Total Flies enclosed</u> | <u>Driven genotype</u>                                                                                | <u>Total driven progeny</u> | <u>Mean % of driven progeny which enclosed</u> | <u>Expected % of driven progeny</u> | <u>Fraction of driven progeny (According to Mendelian ratios)</u> | <u>Fly enclosure % out of 10% driven progeny</u> |
|-----------------------------------------------------------------------------------------------------------------------------------|-----------------------------|-------------------------------------------------------------------------------------------------------|-----------------------------|------------------------------------------------|-------------------------------------|-------------------------------------------------------------------|--------------------------------------------------|
| <i>pnr</i> <sup>MD237/TM3,Ser</sup><br>X<br><i>Rab11RNAi</i>                                                                      | 340                         | <i>UAS-Rab11</i> <sup>RNAi/+</sup> ;<br><i>pnr</i> <sup>MD237/+</sup>                                 | 16                          | 5.19                                           | 50                                  | 0.5                                                               | 10.38                                            |
| <i>pnr</i> <sup>MD237/TM3,Ser</sup><br>X<br><i>UAS-YFP-Rab11</i> <sup>Q70L/CyO</sup>                                              | 605                         | <i>UAS-YFP-Rab11</i> <sup>CA/+</sup> ; <i>pnr</i> <sup>MD237/+</sup>                                  | 147                         | 24.36                                          | 25                                  | 0.25                                                              | 97.4                                             |
| <i>pnr</i> <sup>MD237/TM3,Ser</sup><br>X<br><i>UAS-IgI</i> <sup>RNAi</sup>                                                        | 375                         | <i>UAS-IgI</i> <sup>RNAi</sup> / <i>pnr</i> <sup>MD237</sup>                                          | 22                          | 6.11                                           | 50                                  | 0.5                                                               | 12.22                                            |
| <i>pnr</i> <sup>MD237/TM3,Ser</sup><br>X<br><i>UAS-Rab11</i> <sup>RNAi</sup> ; <i>UAS-IgI</i> <sup>RNAi</sup>                     | 535                         | <i>UAS-Rab11</i> <sup>RNAi</sup> ; <i>UAS-IgI</i> <sup>RNAi</sup> / <i>pnr</i> <sup>MD237</sup>       | 79                          | 14.74                                          | 50                                  | 0.5                                                               | 29.48                                            |
| <i>pnr</i> <sup>MD237/TM3,Ser</sup><br>X<br><i>UAS-YFP-Rab11</i> <sup>Q70L</sup> ; <i>UAS-IgI</i> <sup>RNAi</sup> / <i>CyO-Tb</i> | 449                         | <i>UAS-YFP-Rab11</i> <sup>Q70L/+</sup> ; <i>UAS-IgI</i> <sup>RNAi</sup> / <i>pnr</i> <sup>MD237</sup> | 5                           | 1.13                                           | 25                                  | 0.25                                                              | 4.54                                             |
| <i>pnr</i> <sup>MD237/TM3,Ser</sup><br>X<br>+/+                                                                                   | 316                         | +/+/ <i>pnr</i> <sup>MD237</sup>                                                                      | 310                         | 47.30                                          | 50                                  | 0.5                                                               | 94.61                                            |
